# Supplementary material for: Social Network Analysis and Mining to Monitor and Identify Problems with Large-Scale Information and Communication Technology Interventions
Source: PLoS One. 2016 Jan 4;11(1):e0146220. doi: 10.1371/journal.pone.0146220 (PMC4699760; doi:10.1371/journal.pone.0146220)
Supplement: S1 File — (XLSX) [file pone.0146220.s001.xlsx]

## Sheet: Sheet1
S1 File. Indicators for Brazilian Municipalities.
Federative Unit	Cod_Municipality	Municipality	Population (Total)	Households (Total)	mhdi_education	mhdi_income	national_broadband_plan	households_internet
RO	1100015	Alta Floresta D'Oeste	24422	7443	0.526	0.657	0	1253
RO	1100023	Ariquemes	90354	27654	0.6	0.716	0	6258
RO	1100031	Cabixi	6309	1979	0.559	0.65	0	241
RO	1100049	Cacoal	78601	24413	0.62	0.727	0	6454
RO	1100056	Cerejeiras	17030	5399	0.602	0.688	0	1134
RO	1100064	Colorado do Oeste	18602	6013	0.584	0.676	0	1405
RO	1100072	Corumbiara	8802	2770	0.473	0.63	0	266
RO	1100080	Costa Marques	13700	3811	0.493	0.616	0	457
RO	1100098	Espigão D'Oeste	28741	8797	0.536	0.691	0	1568
RO	1100106	Guajará-Mirim	41646	11348	0.519	0.663	0	2151
RO	1100114	Jaru	52043	16076	0.577	0.687	0	3148
RO	1100122	Ji-Paraná	116587	36216	0.617	0.728	0	9989
RO	1100130	Machadinho D'Oeste	31107	9231	0.446	0.629	0	1106
RO	1100148	Nova Brasilândia D'Oeste	19845	6029	0.524	0.664	0	742
RO	1100155	Ouro Preto do Oeste	37941	11824	0.569	0.687	0	2648
RO	1100189	Pimenta Bueno	33754	10201	0.613	0.726	0	2617
RO	1100205	Porto Velho	426558	124407	0.638	0.764	1	38447
RO	1100254	Presidente Médici	22319	6900	0.55	0.671	0	1133
RO	1100262	Rio Crespo	3316	1014	0.513	0.637	0	53
RO	1100288	Rolim de Moura	50672	16070	0.598	0.709	0	4245
RO	1100296	Santa Luzia D'Oeste	8886	2773	0.564	0.657	1	429
RO	1100304	Vilhena	76187	23985	0.659	0.734	0	7539
RO	1100320	São Miguel do Guaporé	21824	6466	0.537	0.644	0	653
RO	1100338	Nova Mamoré	22552	6446	0.424	0.619	0	529
RO	1100346	Alvorada D'Oeste	16864	5101	0.534	0.654	0	654
RO	1100379	Alto Alegre dos Parecis	12826	3719	0.443	0.603	0	351
RO	1100403	Alto Paraíso	17144	5086	0.457	0.664	1	448
RO	1100452	Buritis	32385	9570	0.479	0.65	0	1234
RO	1100502	Novo Horizonte do Oeste	10237	2996	0.527	0.606	0	245
RO	1100601	Cacaulândia	5727	1697	0.506	0.664	1	171
RO	1100700	Campo Novo de Rondônia	12669	3660	0.404	0.667	0	220
RO	1100809	Candeias do Jamari	19782	5720	0.512	0.652	0	605
RO	1100908	Castanheiras	3581	1119	0.547	0.65	0	54
RO	1100924	Chupinguaia	8304	2478	0.514	0.659	0	438
RO	1100940	Cujubim	15873	4626	0.439	0.663	0	515
RO	1101005	Governador Jorge Teixeira	10513	3016	0.444	0.627	0	143
RO	1101104	Itapuã do Oeste	8561	2576	0.488	0.633	0	259
RO	1101203	Ministro Andreazza	10354	2928	0.518	0.647	0	291
RO	1101302	Mirante da Serra	11869	3515	0.494	0.673	0	397
RO	1101401	Monte Negro	14090	4104	0.454	0.645	0	532
RO	1101435	Nova União	7498	2104	0.442	0.608	0	113
RO	1101450	Parecis	4810	1407	0.485	0.604	0	114
RO	1101468	Pimenteiras do Oeste	2322	723	0.545	0.662	0	55
RO	1101476	Primavera de Rondônia	3523	1087	0.512	0.645	0	140
RO	1101484	São Felipe D'Oeste	6018	1819	0.571	0.615	0	175
RO	1101492	São Francisco do Guaporé	16019	4757	0.462	0.657	0	604
RO	1101500	Seringueiras	11649	3407	0.427	0.644	0	314
RO	1101559	Teixeirópolis	4893	1486	0.498	0.653	0	139
RO	1101609	Theobroma	10644	3159	0.434	0.622	0	112
RO	1101708	Urupá	12969	3940	0.471	0.621	0	284
RO	1101757	Vale do Anari	9361	2810	0.421	0.626	0	236
RO	1101807	Vale do Paraíso	8218	2441	0.485	0.641	0	190
AC	1200013	Acrelândia	12538	3473	0.466	0.584	0	258
AC	1200054	Assis Brasil	6075	1565	0.456	0.578	0	66
AC	1200104	Brasiléia	21438	5973	0.485	0.619	0	766
AC	1200138	Bujari	8474	2344	0.439	0.603	1	171
AC	1200179	Capixaba	8810	2361	0.398	0.601	0	113
AC	1200203	Cruzeiro do Sul	78444	18930	0.582	0.648	0	2593
AC	1200252	Epitaciolândia	15126	4424	0.553	0.654	0	683
AC	1200302	Feijó	32311	7076	0.388	0.559	0	636
AC	1200328	Jordão	6531	1311	0.283	0.499	0	7
AC	1200336	Mâncio Lima	15246	3603	0.546	0.58	0	279
AC	1200344	Manoel Urbano	7989	1868	0.373	0.586	1	80
AC	1200351	Marechal Thaumaturgo	14200	2768	0.361	0.479	0	81
AC	1200385	Plácido de Castro	17203	4783	0.517	0.593	0	401
AC	1200393	Porto Walter	9172	1728	0.397	0.521	0	9
AC	1200401	Rio Branco	335796	96276	0.661	0.729	1	27197
AC	1200427	Rodrigues Alves	14334	3150	0.477	0.518	1	69
AC	1200435	Santa Rosa do Purus	4612	830	0.34	0.519	0	43
AC	1200450	Senador Guiomard	20153	5670	0.513	0.649	0	717
AC	1200500	Sena Madureira	37993	9413	0.456	0.593	0	1006
AC	1200609	Tarauacá	35526	7592	0.392	0.554	0	703
AC	1200708	Xapuri	16016	4509	0.448	0.621	0	572
AC	1200807	Porto Acre	14806	4045	0.418	0.593	0	196
AM	1300029	Alvarães	14080	2501	0.377	0.499	0	94
AM	1300060	Amaturá	9657	1696	0.455	0.499	0	43
AM	1300086	Anamã	10193	1898	0.526	0.537	0	48
AM	1300102	Anori	16289	3083	0.433	0.54	0	76
AM	1300144	Apuí	18059	4643	0.54	0.621	0	256
AM	1300201	Atalaia do Norte	15149	2930	0.259	0.481	0	71
AM	1300300	Autazes	31876	6983	0.446	0.539	0	67
AM	1300409	Barcelos	25715	4983	0.315	0.545	0	320
AM	1300508	Barreirinha	27361	5187	0.522	0.469	0	98
AM	1300607	Benjamin Constant	33391	6091	0.471	0.526	0	167
AM	1300631	Beruri	15500	2888	0.346	0.512	0	77
AM	1300680	Boa Vista do Ramos	14921	2776	0.484	0.496	0	76
AM	1300706	Boca do Acre	29880	7219	0.455	0.576	0	400
AM	1300805	Borba	34452	6673	0.425	0.532	0	89
AM	1300839	Caapiranga	10909	2233	0.436	0.544	0	40
AM	1300904	Canutama	12727	2958	0.379	0.522	0	125
AM	1301001	Carauari	25700	5274	0.416	0.534	0	298
AM	1301100	Careiro	32631	7426	0.431	0.515	0	212
AM	1301159	Careiro da Várzea	23963	5760	0.45	0.523	0	140
AM	1301209	Coari	75909	15288	0.425	0.606	0	1029
AM	1301308	Codajás	23119	4497	0.421	0.546	0	139
AM	1301407	Eirunepé	30666	6271	0.431	0.548	0	352
AM	1301506	Envira	16328	3214	0.349	0.521	0	78
AM	1301605	Fonte Boa	22659	3909	0.4	0.518	0	43
AM	1301654	Guajará	14074	2661	0.387	0.51	0	207
AM	1301704	Humaitá	44116	9921	0.451	0.621	0	1058
AM	1301803	Ipixuna	22199	3727	0.302	0.476	0	33
AM	1301852	Iranduba	40735	9849	0.476	0.607	0	327
AM	1301902	Itacoatiara	86840	20036	0.534	0.618	0	1579
AM	1301951	Itamarati	8040	1573	0.266	0.529	0	6
AM	1302009	Itapiranga	8200	1804	0.594	0.594	0	105
AM	1302108	Japurá	7289	1309	0.345	0.552	0	79
AM	1302207	Juruá	10822	2049	0.376	0.538	0	6
AM	1302306	Jutaí	17964	3192	0.34	0.528	0	105
AM	1302405	Lábrea	37574	8250	0.374	0.538	0	280
AM	1302504	Manacapuru	85144	18252	0.481	0.604	0	849
AM	1302553	Manaquiri	22807	4915	0.51	0.556	0	51
AM	1302603	Manaus	1802525	464015	0.658	0.738	0	116928
AM	1302702	Manicoré	47011	9628	0.456	0.58	0	336
AM	1302801	Maraã	17364	2801	0.348	0.466	0	32
AM	1302900	Maués	51847	10099	0.464	0.549	0	528
AM	1303007	Nhamundá	18278	3795	0.503	0.513	0	156
AM	1303106	Nova Olinda do Norte	30761	5659	0.412	0.541	0	108
AM	1303205	Novo Airão	14780	3194	0.434	0.551	0	66
AM	1303304	Novo Aripuanã	21389	4304	0.421	0.532	0	86
AM	1303403	Parintins	102066	20958	0.605	0.589	0	1817
AM	1303502	Pauini	18153	3079	0.317	0.531	0	52
AM	1303536	Presidente Figueiredo	27121	7390	0.538	0.627	1	534
AM	1303569	Rio Preto da Eva	25758	6330	0.493	0.59	0	235
AM	1303601	Santa Isabel do Rio Negro	18133	2706	0.323	0.461	0	79
AM	1303700	Santo Antônio do Içá	24487	4050	0.353	0.438	0	49
AM	1303809	São Gabriel da Cachoeira	37300	7670	0.476	0.61	0	336
AM	1303908	São Paulo de Olivença	31426	5362	0.386	0.471	0	115
AM	1303957	São Sebastião do Uatumã	10688	1954	0.464	0.561	0	39
AM	1304005	Silves	8445	1744	0.584	0.546	0	20
AM	1304062	Tabatinga	52279	10266	0.505	0.602	0	883
AM	1304104	Tapauá	19077	3909	0.355	0.512	0	36
AM	1304203	Tefé	61399	12317	0.511	0.637	0	1155
AM	1304237	Tonantins	17056	2799	0.416	0.508	0	87
AM	1304260	Uarini	11906	2242	0.378	0.535	0	13
AM	1304302	Urucará	17019	3447	0.575	0.551	0	105
AM	1304401	Urucurituba	17731	3337	0.487	0.538	0	112
RR	1400027	Amajari	9330	2132	0.319	0.437	0	6
RR	1400050	Alto Alegre	16286	3714	0.379	0.518	0	31
RR	1400100	Boa Vista	284258	77888	0.708	0.737	0	18661
RR	1400159	Bonfim	10951	2535	0.509	0.597	0	48
RR	1400175	Cantá	13778	3666	0.509	0.581	0	130
RR	1400209	Caracaraí	18384	4522	0.518	0.601	0	229
RR	1400233	Caroebe	8114	2188	0.549	0.6	0	57
RR	1400282	Iracema	8676	2256	0.434	0.56	0	95
RR	1400308	Mucajaí	14814	3916	0.547	0.661	0	190
RR	1400407	Normandia	8926	1711	0.502	0.52	0	22
RR	1400456	Pacaraima	10448	2413	0.558	0.624	0	126
RR	1400472	Rorainópolis	25587	6011	0.519	0.574	1	291
RR	1400506	São João da Baliza	6778	1756	0.587	0.614	0	88
RR	1400605	São Luiz	6750	1810	0.574	0.605	0	43
RR	1400704	Uiramutã	8147	1447	0.276	0.439	0	7
PA	1500107	Abaetetuba	141054	31372	0.537	0.579	0	1457
PA	1500131	Abel Figueiredo	6792	1880	0.481	0.625	0	91
PA	1500206	Acará	53605	11846	0.332	0.517	0	152
PA	1500305	Afuá	35017	6814	0.311	0.485	0	60
PA	1500347	Água Azul do Norte	25061	5917	0.399	0.563	0	89
PA	1500404	Alenquer	52714	12168	0.436	0.529	0	301
PA	1500503	Almeirim	33665	7923	0.497	0.659	0	903
PA	1500602	Altamira	105030	26937	0.548	0.662	0	2541
PA	1500701	Anajás	24771	4896	0.29	0.506	0	66
PA	1500800	Ananindeua	471744	126266	0.658	0.684	0	26478
PA	1500859	Anapu	20493	5098	0.371	0.563	0	205
PA	1500909	Augusto Corrêa	40499	8866	0.38	0.48	0	70
PA	1500958	Aurora do Pará	26579	5856	0.358	0.504	0	325
PA	1501006	Aveiro	15767	3452	0.45	0.47	0	33
PA	1501105	Bagre	23855	4072	0.28	0.481	0	129
PA	1501204	Baião	36907	8081	0.467	0.538	0	113
PA	1501253	Bannach	3434	1006	0.42	0.635	0	12
PA	1501303	Barcarena	99800	24916	0.564	0.643	0	2742
PA	1501402	Belém	1392031	370131	0.673	0.751	0	115590
PA	1501451	Belterra	16324	4004	0.478	0.548	0	120
PA	1501501	Benevides	51663	13779	0.592	0.623	0	983
PA	1501576	Bom Jesus do Tocantins	15246	3873	0.437	0.601	0	120
PA	1501600	Bonito	13630	3345	0.398	0.531	0	51
PA	1501709	Bragança	113165	26397	0.486	0.589	0	1633
PA	1501725	Brasil Novo	17960	4375	0.451	0.632	0	126
PA	1501758	Brejo Grande do Araguaia	7324	1923	0.473	0.588	0	38
PA	1501782	Breu Branco	52497	12271	0.422	0.555	0	491
PA	1501808	Breves	92865	17654	0.312	0.524	0	784
PA	1501907	Bujaru	25700	5880	0.437	0.495	0	70
PA	1501956	Cachoeira do Piriá	26476	5665	0.303	0.449	0	14
PA	1502004	Cachoeira do Arari	20460	4594	0.398	0.525	0	120
PA	1502103	Cametá	120904	23668	0.474	0.538	0	741
PA	1502152	Canaã dos Carajás	26727	7517	0.569	0.67	0	800
PA	1502202	Capanema	63628	17002	0.58	0.61	0	1718
PA	1502301	Capitão Poço	51899	13024	0.385	0.573	0	380
PA	1502400	Castanhal	173096	45745	0.582	0.654	0	6717
PA	1502509	Chaves	21138	4326	0.234	0.516	0	0
PA	1502608	Colares	11382	2800	0.528	0.541	0	11
PA	1502707	Conceição do Araguaia	45530	12917	0.54	0.631	0	1208
PA	1502756	Concórdia do Pará	28221	6332	0.438	0.56	0	175
PA	1502764	Cumaru do Norte	10478	2916	0.33	0.635	0	12
PA	1502772	Curionópolis	18295	5248	0.536	0.592	0	218
PA	1502806	Curralinho	28582	5379	0.323	0.508	0	134
PA	1502855	Curuá	12262	2655	0.495	0.501	0	62
PA	1502905	Curuçá	34490	8515	0.48	0.542	0	217
PA	1502939	Dom Eliseu	51318	13118	0.502	0.606	0	890
PA	1502954	Eldorado dos Carajás	31745	8325	0.405	0.572	0	207
PA	1503002	Faro	8181	1719	0.47	0.501	0	40
PA	1503044	Floresta do Araguaia	17825	4861	0.437	0.573	0	116
PA	1503077	Garrafão do Norte	25051	5827	0.353	0.54	0	69
PA	1503093	Goianésia do Pará	30437	7883	0.404	0.585	0	409
PA	1503101	Gurupá	29060	5423	0.333	0.51	0	0
PA	1503200	Igarapé-Açu	35843	9158	0.49	0.579	0	354
PA	1503309	Igarapé-Miri	58023	12059	0.413	0.514	0	325
PA	1503408	Inhangapi	10064	2504	0.456	0.55	0	85
PA	1503457	Ipixuna do Pará	51383	11409	0.304	0.508	0	281
PA	1503507	Irituia	31382	7503	0.427	0.536	0	126
PA	1503606	Itaituba	97343	24225	0.51	0.644	0	2224
PA	1503705	Itupiranga	51258	12728	0.364	0.543	0	246
PA	1503754	Jacareacanga	14040	2627	0.279	0.577	0	88
PA	1503804	Jacundá	51375	12639	0.509	0.628	0	765
PA	1503903	Juruti	47123	9578	0.501	0.547	0	432
PA	1504000	Limoeiro do Ajuru	25028	4889	0.425	0.493	0	102
PA	1504059	Mãe do Rio	27892	7078	0.458	0.615	0	533
PA	1504109	Magalhães Barata	8115	1987	0.507	0.524	0	13
PA	1504208	Marabá	233462	61352	0.564	0.673	0	9231
PA	1504307	Maracanã	28376	6848	0.454	0.534	0	141
PA	1504406	Marapanim	26605	6745	0.521	0.57	0	116
PA	1504422	Marituba	108251	27643	0.628	0.621	0	2724
PA	1504455	Medicilândia	27442	7440	0.408	0.605	0	179
PA	1504505	Melgaço	24789	4075	0.207	0.454	0	28
PA	1504604	Mocajuba	26745	5384	0.467	0.539	0	155
PA	1504703	Moju	69921	15687	0.375	0.578	0	418
PA	1504802	Monte Alegre	55459	13791	0.495	0.541	0	499
PA	1504901	Muaná	34237	7042	0.391	0.54	0	139
PA	1504950	Nova Esperança do Piriá	20159	4729	0.346	0.482	0	46
PA	1504976	Nova Ipixuna	14645	3797	0.435	0.59	0	84
PA	1505007	Nova Timboteua	13660	3662	0.507	0.564	0	118
PA	1505031	Novo Progresso	25106	6984	0.519	0.709	0	1041
PA	1505064	Novo Repartimento	62124	15231	0.376	0.557	0	431
PA	1505106	Óbidos	49254	11361	0.499	0.556	0	328
PA	1505205	Oeiras do Pará	28595	5471	0.344	0.502	0	46
PA	1505304	Oriximiná	62963	13710	0.52	0.599	0	1180
PA	1505403	Ourém	16296	4134	0.438	0.575	0	157
PA	1505437	Ourilândia do Norte	27564	7156	0.467	0.653	0	380
PA	1505486	Pacajá	40052	10190	0.338	0.541	0	490
PA	1505494	Palestina do Pará	7487	1999	0.467	0.574	0	59
PA	1505502	Paragominas	97788	25299	0.514	0.667	0	2364
PA	1505536	Parauapebas	153942	42877	0.644	0.701	0	5497
PA	1505551	Pau D'Arco	6029	1653	0.443	0.571	0	59
PA	1505601	Peixe-Boi	7868	2217	0.478	0.543	0	62
PA	1505635	Piçarra	12703	3535	0.402	0.561	0	118
PA	1505650	Placas	23930	5691	0.404	0.541	0	15
PA	1505700	Ponta de Pedras	25989	5883	0.412	0.558	0	148
PA	1505809	Portel	52166	9693	0.286	0.513	0	394
PA	1505908	Porto de Moz	33951	6156	0.322	0.512	0	178
PA	1506005	Prainha	29265	6220	0.359	0.512	0	6
PA	1506104	Primavera	10268	2652	0.435	0.571	0	58
PA	1506112	Quatipuru	12411	3067	0.397	0.55	0	74
PA	1506138	Redenção	75505	20848	0.561	0.674	0	2856
PA	1506161	Rio Maria	17722	5174	0.495	0.651	0	435
PA	1506187	Rondon do Pará	46974	12574	0.457	0.606	0	849
PA	1506195	Rurópolis	40068	9525	0.392	0.548	0	256
PA	1506203	Salinópolis	37430	9327	0.541	0.628	0	532
PA	1506302	Salvaterra	20184	5121	0.488	0.58	0	237
PA	1506351	Santa Bárbara do Pará	17154	4471	0.546	0.575	0	101
PA	1506401	Santa Cruz do Arari	8163	1503	0.461	0.483	0	11
PA	1506500	Santa Isabel do Pará	59476	18055	0.576	0.622	1	875
PA	1506559	Santa Luzia do Pará	19422	4672	0.424	0.53	0	168
PA	1506583	Santa Maria das Barreiras	17198	5265	0.37	0.555	0	104
PA	1506609	Santa Maria do Pará	23033	6369	0.471	0.595	0	232
PA	1506708	Santana do Araguaia	56132	14473	0.478	0.591	0	737
PA	1506807	Santarém	294774	70702	0.648	0.632	0	8686
PA	1506906	Santarém Novo	6145	1550	0.502	0.52	0	44
PA	1507003	Santo Antônio do Tauá	26673	6984	0.561	0.598	0	131
PA	1507102	São Caetano de Odivelas	16891	4259	0.473	0.552	0	73
PA	1507151	São Domingos do Araguaia	23140	6015	0.451	0.629	0	144
PA	1507201	São Domingos do Capim	29827	6432	0.382	0.509	0	129
PA	1507300	São Félix do Xingu	91293	22720	0.411	0.638	0	690
PA	1507409	São Francisco do Pará	15196	3946	0.502	0.571	0	107
PA	1507458	São Geraldo do Araguaia	25584	6879	0.447	0.594	0	373
PA	1507466	São João da Ponta	5265	1352	0.495	0.522	0	0
PA	1507474	São João de Pirabas	20644	5081	0.393	0.529	0	98
PA	1507508	São João do Araguaia	13149	3270	0.424	0.53	0	9
PA	1507607	São Miguel do Guamá	51527	12697	0.471	0.582	0	527
PA	1507706	São Sebastião da Boa Vista	22890	4858	0.439	0.52	0	107
PA	1507755	Sapucaia	5047	1421	0.405	0.639	0	81
PA	1507805	Senador José Porfírio	12998	3340	0.338	0.533	0	59
PA	1507904	Soure	22995	5590	0.525	0.583	0	436
PA	1507953	Tailândia	79299	16567	0.45	0.583	0	998
PA	1507961	Terra Alta	10254	2598	0.536	0.555	0	59
PA	1507979	Terra Santa	16952	3634	0.558	0.602	0	171
PA	1508001	Tomé-Açu	56514	13680	0.424	0.596	0	690
PA	1508035	Tracuateua	27466	6501	0.376	0.514	0	162
PA	1508050	Trairão	16885	4100	0.392	0.594	0	193
PA	1508084	Tucumã	33651	9501	0.525	0.67	0	897
PA	1508100	Tucuruí	97109	23743	0.548	0.675	0	3853
PA	1508126	Ulianópolis	43345	8601	0.425	0.682	0	488
PA	1508159	Uruará	44720	11389	0.42	0.609	0	493
PA	1508209	Vigia	47902	11825	0.516	0.594	0	492
PA	1508308	Viseu	56681	12397	0.366	0.482	0	115
PA	1508357	Vitória do Xingu	13480	3003	0.451	0.594	0	61
PA	1508407	Xinguara	40573	11649	0.503	0.671	0	1411
AP	1600055	Serra do Navio	4409	1153	0.692	0.659	0	34
AP	1600105	Amapá	8005	1801	0.532	0.631	0	12
AP	1600154	Pedra Branca do Amapari	10773	2743	0.502	0.628	0	54
AP	1600204	Calçoene	8964	2264	0.55	0.636	0	64
AP	1600212	Cutias	4634	1041	0.566	0.576	0	11
AP	1600238	Ferreira Gomes	5772	1360	0.542	0.635	0	55
AP	1600253	Itaubal	4267	969	0.477	0.528	0	13
AP	1600279	Laranjal do Jari	39805	9892	0.573	0.641	0	440
AP	1600303	Macapá	397913	95613	0.663	0.723	0	21453
AP	1600402	Mazagão	17030	3562	0.449	0.609	0	81
AP	1600501	Oiapoque	20426	4843	0.527	0.693	0	191
AP	1600535	Porto Grande	16825	4206	0.554	0.61	0	137
AP	1600550	Pracuúba	3783	808	0.544	0.539	0	0
AP	1600600	Santana	101203	22518	0.638	0.654	0	3312
AP	1600709	Tartarugalzinho	12435	2836	0.473	0.553	0	14
AP	1600808	Vitória do Jari	12445	2844	0.517	0.587	0	129
TO	1700251	Abreulândia	2387	760	0.502	0.7	0	42
TO	1700301	Aguiarnópolis	5158	1329	0.571	0.618	1	107
TO	1700350	Aliança do Tocantins	5663	1730	0.596	0.61	0	96
TO	1700400	Almas	7595	2141	0.524	0.616	0	98
TO	1700707	Alvorada	8380	2614	0.623	0.677	0	401
TO	1701002	Ananás	9873	2678	0.605	0.621	0	183
TO	1701051	Angico	3169	844	0.612	0.576	0	20
TO	1701101	Aparecida do Rio Negro	4213	1254	0.588	0.593	0	54
TO	1701309	Aragominas	5882	1700	0.461	0.611	0	53
TO	1701903	Araguacema	6317	1869	0.553	0.587	0	92
TO	1702000	Araguaçu	8786	2998	0.602	0.642	0	261
TO	1702109	Araguaína	150520	44092	0.712	0.727	0	10008
TO	1702158	Araguanã	5030	1397	0.473	0.617	0	94
TO	1702208	Araguatins	31324	8209	0.525	0.604	0	712
TO	1702307	Arapoema	6742	1989	0.601	0.645	0	148
TO	1702406	Arraias	10643	3227	0.523	0.636	0	373
TO	1702554	Augustinópolis	15965	4351	0.619	0.614	0	528
TO	1702703	Aurora do Tocantins	3446	1112	0.57	0.676	0	74
TO	1702901	Axixá do Tocantins	9275	2457	0.566	0.595	0	93
TO	1703008	Babaçulândia	10446	2552	0.568	0.589	0	119
TO	1703057	Bandeirantes do Tocantins	3124	918	0.571	0.57	0	37
TO	1703073	Barra do Ouro	4123	1017	0.517	0.557	0	24
TO	1703107	Barrolândia	5346	1661	0.541	0.6	0	60
TO	1703206	Bernardo Sayão	4467	1356	0.573	0.606	0	44
TO	1703305	Bom Jesus do Tocantins	3768	1055	0.555	0.621	0	49
TO	1703602	Brasilândia do Tocantins	2066	611	0.601	0.64	0	46
TO	1703701	Brejinho de Nazaré	5188	1523	0.619	0.635	0	80
TO	1703800	Buriti do Tocantins	9770	2289	0.601	0.575	0	127
TO	1703826	Cachoeirinha	2148	564	0.59	0.548	1	10
TO	1703842	Campos Lindos	8139	1899	0.377	0.578	0	71
TO	1703867	Cariri do Tocantins	3754	1447	0.549	0.639	0	98
TO	1703883	Carmolândia	2305	666	0.521	0.621	0	56
TO	1703891	Carrasco Bonito	3690	938	0.531	0.543	0	33
TO	1703909	Caseara	4601	1355	0.534	0.647	0	84
TO	1704105	Centenário	2565	702	0.461	0.571	0	10
TO	1704600	Chapada de Areia	1335	455	0.529	0.619	0	15
TO	1705102	Chapada da Natividade	3280	928	0.497	0.59	1	32
TO	1705508	Colinas do Tocantins	30879	9298	0.614	0.69	0	1622
TO	1705557	Combinado	4669	1453	0.639	0.649	0	179
TO	1705607	Conceição do Tocantins	4182	1159	0.478	0.588	0	63
TO	1706001	Couto Magalhães	5009	1422	0.508	0.574	0	72
TO	1706100	Cristalândia	7218	2287	0.57	0.663	0	169
TO	1706258	Crixás do Tocantins	1566	493	0.555	0.603	0	28
TO	1706506	Darcinópolis	5273	1509	0.429	0.597	1	70
TO	1707009	Dianópolis	19110	5201	0.624	0.673	0	847
TO	1707108	Divinópolis do Tocantins	6363	1981	0.585	0.667	0	108
TO	1707207	Dois Irmãos do Tocantins	7161	2278	0.442	0.551	0	44
TO	1707306	Dueré	4589	1459	0.566	0.654	0	73
TO	1707405	Esperantina	9476	2257	0.524	0.495	0	29
TO	1707553	Fátima	3805	1145	0.638	0.653	0	112
TO	1707652	Figueirópolis	5340	1749	0.6	0.664	0	248
TO	1707702	Filadélfia	8502	2296	0.522	0.578	0	102
TO	1708205	Formoso do Araguaia	18428	5391	0.587	0.64	0	476
TO	1708254	Fortaleza do Tabocão	2423	694	0.575	0.616	1	55
TO	1708304	Goianorte	4960	1528	0.497	0.598	0	55
TO	1709005	Goiatins	12064	2996	0.462	0.541	0	148
TO	1709302	Guaraí	23212	7021	0.67	0.724	0	1193
TO	1709500	Gurupi	76765	23369	0.706	0.736	0	6139
TO	1709807	Ipueiras	1639	520	0.518	0.576	0	6
TO	1710508	Itacajá	7104	1888	0.491	0.585	0	130
TO	1710706	Itaguatins	6029	1627	0.511	0.572	0	72
TO	1710904	Itapiratins	3534	1071	0.446	0.611	0	17
TO	1711100	Itaporã do Tocantins	2439	751	0.531	0.613	0	24
TO	1711506	Jaú do Tocantins	3507	1145	0.529	0.672	0	83
TO	1711803	Juarina	2231	679	0.478	0.563	0	18
TO	1711902	Lagoa da Confusão	10215	2708	0.496	0.63	0	247
TO	1711951	Lagoa do Tocantins	3525	901	0.471	0.543	0	22
TO	1712009	Lajeado	2773	813	0.573	0.673	0	64
TO	1712157	Lavandeira	1605	492	0.62	0.598	0	37
TO	1712405	Lizarda	3731	1019	0.415	0.584	0	16
TO	1712454	Luzinópolis	2622	730	0.605	0.593	1	17
TO	1712504	Marianópolis do Tocantins	4352	1342	0.504	0.63	0	42
TO	1712702	Mateiros	2219	571	0.463	0.586	0	28
TO	1712801	Maurilândia do Tocantins	3158	850	0.498	0.542	0	19
TO	1713205	Miracema do Tocantins	20692	5973	0.579	0.675	0	940
TO	1713304	Miranorte	12626	3798	0.571	0.633	0	359
TO	1713601	Monte do Carmo	6717	1893	0.489	0.608	0	80
TO	1713700	Monte Santo do Tocantins	2085	687	0.547	0.572	0	12
TO	1713809	Palmeiras do Tocantins	5746	1512	0.522	0.586	0	64
TO	1713957	Muricilândia	3152	898	0.524	0.543	0	17
TO	1714203	Natividade	9000	2635	0.556	0.646	1	177
TO	1714302	Nazaré	4386	1229	0.576	0.584	0	30
TO	1714880	Nova Olinda	10686	3012	0.535	0.614	0	236
TO	1715002	Nova Rosalândia	3770	1141	0.628	0.582	0	43
TO	1715101	Novo Acordo	3762	1064	0.53	0.618	0	42
TO	1715150	Novo Alegre	2286	689	0.654	0.642	0	100
TO	1715259	Novo Jardim	2457	662	0.52	0.559	0	29
TO	1715507	Oliveira de Fátima	1035	319	0.614	0.627	0	18
TO	1715705	Palmeirante	4954	1369	0.436	0.564	0	39
TO	1715754	Palmeirópolis	7342	2388	0.571	0.652	1	229
TO	1716109	Paraíso do Tocantins	44432	13499	0.706	0.759	0	2309
TO	1716208	Paranã	10335	2922	0.461	0.588	0	102
TO	1716307	Pau D'Arco	4588	1324	0.587	0.621	0	61
TO	1716505	Pedro Afonso	11542	3358	0.664	0.699	0	533
TO	1716604	Peixe	10389	3321	0.555	0.679	0	268
TO	1716653	Pequizeiro	5052	1518	0.518	0.589	0	83
TO	1716703	Colméia	8607	2823	0.574	0.645	0	254
TO	1717008	Pindorama do Tocantins	4506	1242	0.521	0.579	0	51
TO	1717206	Piraquê	2920	864	0.511	0.593	0	23
TO	1717503	Pium	6696	2014	0.527	0.633	0	86
TO	1717800	Ponte Alta do Bom Jesus	4548	1321	0.455	0.589	0	23
TO	1717909	Ponte Alta do Tocantins	7180	2040	0.531	0.587	0	111
TO	1718006	Porto Alegre do Tocantins	2795	743	0.584	0.586	0	22
TO	1718204	Porto Nacional	49143	13914	0.701	0.699	0	2455
TO	1718303	Praia Norte	7661	1837	0.517	0.526	0	53
TO	1718402	Presidente Kennedy	3685	1083	0.582	0.628	0	103
TO	1718451	Pugmil	2366	722	0.595	0.621	0	22
TO	1718501	Recursolândia	3768	904	0.345	0.49	0	7
TO	1718550	Riachinho	4183	1151	0.49	0.503	0	32
TO	1718659	Rio da Conceição	1714	455	0.561	0.557	0	29
TO	1718709	Rio dos Bois	2570	787	0.501	0.588	0	42
TO	1718758	Rio Sono	6259	1690	0.482	0.574	0	79
TO	1718808	Sampaio	3868	998	0.59	0.546	0	62
TO	1718840	Sandolândia	3326	1124	0.578	0.626	0	81
TO	1718865	Santa Fé do Araguaia	6599	1841	0.482	0.604	0	152
TO	1718881	Santa Maria do Tocantins	2894	818	0.543	0.6	0	12
TO	1718899	Santa Rita do Tocantins	2128	672	0.527	0.63	0	29
TO	1718907	Santa Rosa do Tocantins	4568	1348	0.471	0.574	0	71
TO	1719004	Santa Tereza do Tocantins	2523	664	0.575	0.618	0	20
TO	1720002	Santa Terezinha do Tocantins	2471	683	0.584	0.583	0	27
TO	1720101	São Bento do Tocantins	4615	1171	0.506	0.595	0	23
TO	1720150	São Félix do Tocantins	1445	345	0.446	0.55	0	11
TO	1720200	São Miguel do Tocantins	10490	2737	0.544	0.582	0	95
TO	1720259	São Salvador do Tocantins	2910	834	0.471	0.592	0	37
TO	1720309	São Sebastião do Tocantins	4283	1079	0.487	0.516	0	23
TO	1720499	São Valério da Natividade	4384	1347	0.539	0.605	0	55
TO	1720655	Silvanópolis	5071	1546	0.592	0.638	0	109
TO	1720804	Sítio Novo do Tocantins	9148	2416	0.526	0.55	0	116
TO	1720853	Sucupira	1739	551	0.599	0.623	0	29
TO	1720903	Taguatinga	15053	4384	0.497	0.628	0	453
TO	1720937	Taipas do Tocantins	1945	532	0.47	0.578	0	6
TO	1720978	Talismã	2562	805	0.535	0.654	0	66
TO	1721000	Palmas	228297	69628	0.749	0.789	1	23962
TO	1721109	Tocantínia	6598	1666	0.459	0.57	0	124
TO	1721208	Tocantinópolis	22608	6232	0.623	0.634	0	774
TO	1721257	Tupirama	1574	478	0.593	0.629	1	31
TO	1721307	Tupiratins	2097	646	0.425	0.601	0	9
TO	1722081	Wanderlândia	10978	2931	0.561	0.619	1	181
TO	1722107	Xambioá	11484	3200	0.57	0.648	0	320
MA	2100055	Açailândia	104013	27605	0.602	0.643	0	3967
MA	2100105	Afonso Cunha	5957	1305	0.434	0.471	0	12
MA	2100154	Água Doce do Maranhão	11590	2730	0.363	0.494	0	25
MA	2100204	Alcântara	21852	6084	0.475	0.525	0	201
MA	2100303	Aldeias Altas	23952	5795	0.374	0.5	0	41
MA	2100402	Altamira do Maranhão	10211	2643	0.473	0.486	0	69
MA	2100436	Alto Alegre do Maranhão	24596	5857	0.444	0.516	0	164
MA	2100477	Alto Alegre do Pindaré	31028	7282	0.483	0.465	1	124
MA	2100501	Alto Parnaíba	10765	2657	0.474	0.683	0	144
MA	2100550	Amapá do Maranhão	6431	1512	0.406	0.503	0	34
MA	2100600	Amarante do Maranhão	37894	9328	0.441	0.541	0	131
MA	2100709	Anajatuba	25294	6503	0.492	0.523	0	140
MA	2100808	Anapurus	13923	3333	0.502	0.511	0	106
MA	2100832	Apicum-Açu	14959	3414	0.483	0.529	0	66
MA	2100873	Araguanã	13957	3057	0.444	0.483	0	74
MA	2100907	Araioses	42600	10275	0.402	0.497	0	257
MA	2100956	Arame	31568	7013	0.365	0.525	0	97
MA	2101004	Arari	28477	6948	0.546	0.587	0	188
MA	2101103	Axixá	11425	2548	0.634	0.535	0	62
MA	2101202	Bacabal	99960	26330	0.591	0.619	0	2723
MA	2101251	Bacabeira	14965	3664	0.58	0.558	0	59
MA	2101301	Bacuri	16626	4224	0.484	0.54	0	66
MA	2101350	Bacurituba	5304	1398	0.479	0.474	0	17
MA	2101400	Balsas	83537	21410	0.597	0.674	0	2596
MA	2101509	Barão de Grajaú	17816	4735	0.484	0.578	0	207
MA	2101608	Barra do Corda	82692	21707	0.498	0.585	0	1523
MA	2101707	Barreirinhas	54991	12252	0.479	0.515	0	300
MA	2101731	Belágua	6527	1277	0.455	0.417	0	14
MA	2101772	Bela Vista do Maranhão	11946	2985	0.45	0.515	0	58
MA	2101806	Benedito Leite	5473	1427	0.426	0.531	0	47
MA	2101905	Bequimão	20339	5647	0.561	0.51	0	91
MA	2101939	Bernardo do Mearim	5996	1508	0.547	0.544	0	32
MA	2101970	Boa Vista do Gurupi	7949	1837	0.461	0.515	0	26
MA	2102002	Bom Jardim	39093	9627	0.4	0.519	0	432
MA	2102036	Bom Jesus das Selvas	28456	6253	0.431	0.537	0	243
MA	2102077	Bom Lugar	14823	3528	0.493	0.486	0	17
MA	2102101	Brejo	33314	7953	0.454	0.517	0	226
MA	2102150	Brejo de Areia	10540	1280	0.408	0.507	0	28
MA	2102200	Buriti	27042	6070	0.48	0.479	0	98
MA	2102309	Buriti Bravo	22886	5720	0.506	0.539	0	97
MA	2102325	Buriticupu	65226	15018	0.455	0.533	0	454
MA	2102358	Buritirana	14770	3791	0.505	0.54	0	19
MA	2102374	Cachoeira Grande	8442	1772	0.476	0.422	0	0
MA	2102408	Cajapió	10632	2594	0.505	0.466	0	48
MA	2102507	Cajari	18348	4321	0.421	0.456	0	34
MA	2102556	Campestre do Maranhão	13369	3534	0.586	0.611	0	176
MA	2102606	Cândido Mendes	18505	4193	0.456	0.52	0	83
MA	2102705	Cantanhede	20457	4713	0.468	0.497	0	100
MA	2102754	Capinzal do Norte	10698	2884	0.43	0.517	0	77
MA	2102804	Carolina	23979	6350	0.529	0.6	0	540
MA	2102903	Carutapera	22008	5083	0.476	0.533	0	48
MA	2103000	Caxias	155202	40328	0.543	0.595	0	3273
MA	2103109	Cedral	10300	2605	0.57	0.52	0	59
MA	2103125	Central do Maranhão	7988	1987	0.557	0.503	0	3
MA	2103158	Centro do Guilherme	12517	2598	0.442	0.51	0	14
MA	2103174	Centro Novo do Maranhão	17622	3959	0.382	0.508	0	27
MA	2103208	Chapadinha	73281	17682	0.517	0.554	0	856
MA	2103257	Cidelândia	13593	3524	0.529	0.562	0	140
MA	2103307	Codó	118072	29655	0.492	0.568	0	1850
MA	2103406	Coelho Neto	46792	11138	0.454	0.544	0	258
MA	2103505	Colinas	39167	9888	0.524	0.571	0	597
MA	2103554	Conceição do Lago-Açu	14428	3346	0.37	0.492	0	32
MA	2103604	Coroatá	61653	15970	0.475	0.545	0	572
MA	2103703	Cururupu	32594	8447	0.525	0.568	0	305
MA	2103752	Davinópolis	12551	3326	0.535	0.561	0	205
MA	2103802	Dom Pedro	22673	6219	0.545	0.582	0	497
MA	2103901	Duque Bacelar	10634	2387	0.451	0.485	0	28
MA	2104008	Esperantinópolis	18456	4822	0.503	0.561	0	183
MA	2104057	Estreito	35738	10260	0.536	0.666	0	1152
MA	2104073	Feira Nova do Maranhão	8120	1994	0.405	0.511	0	0
MA	2104081	Fernando Falcão	9180	1883	0.286	0.417	0	21
MA	2104099	Formosa da Serra Negra	17780	3884	0.459	0.485	0	30
MA	2104107	Fortaleza dos Nogueiras	11644	2851	0.534	0.566	0	90
MA	2104206	Fortuna	15108	3938	0.494	0.558	0	156
MA	2104305	Godofredo Viana	10635	2632	0.546	0.537	0	9
MA	2104404	Gonçalves Dias	17485	4568	0.445	0.542	0	132
MA	2104503	Governador Archer	10205	2583	0.481	0.545	0	77
MA	2104552	Governador Edison Lobão	15895	4264	0.552	0.589	0	116
MA	2104602	Governador Eugênio Barros	15983	4109	0.462	0.55	0	109
MA	2104628	Governador Luiz Rocha	7337	1898	0.459	0.508	0	40
MA	2104651	Governador Newton Bello	11922	2842	0.387	0.509	0	22
MA	2104677	Governador Nunes Freire	25402	5822	0.472	0.54	0	127
MA	2104701	Graça Aranha	6140	1705	0.459	0.538	0	42
MA	2104800	Grajaú	61903	14972	0.497	0.603	0	639
MA	2104909	Guimarães	12105	3339	0.592	0.535	0	44
MA	2105005	Humberto de Campos	26197	5645	0.455	0.443	0	43
MA	2105104	Icatu	25147	5786	0.472	0.475	0	19
MA	2105153	Igarapé do Meio	12543	3022	0.506	0.53	0	51
MA	2105203	Igarapé Grande	11047	2858	0.536	0.578	0	120
MA	2105302	Imperatriz	247553	68968	0.698	0.697	0	18850
MA	2105351	Itaipava do Grajaú	14264	3293	0.419	0.456	0	5
MA	2105401	Itapecuru Mirim	62123	15739	0.539	0.534	0	742
MA	2105427	Itinga do Maranhão	24891	6637	0.545	0.601	0	522
MA	2105450	Jatobá	8526	2139	0.481	0.522	0	35
MA	2105476	Jenipapo dos Vieiras	15397	3642	0.346	0.445	0	30
MA	2105500	João Lisboa	20381	5420	0.573	0.585	0	400
MA	2105609	Joselândia	15437	3917	0.445	0.533	0	135
MA	2105658	Junco do Maranhão	4020	988	0.443	0.55	0	9
MA	2105708	Lago da Pedra	46108	11475	0.502	0.561	0	475
MA	2105807	Lago do Junco	10736	2594	0.492	0.537	0	67
MA	2105906	Lago Verde	15407	3685	0.466	0.508	0	76
MA	2105922	Lagoa do Mato	10954	2687	0.475	0.525	0	44
MA	2105948	Lago dos Rodrigues	7799	2063	0.534	0.555	0	49
MA	2105963	Lagoa Grande do Maranhão	10536	2412	0.36	0.48	0	50
MA	2105989	Lajeado Novo	6923	1837	0.494	0.561	0	70
MA	2106003	Lima Campos	11415	3191	0.481	0.578	0	133
MA	2106102	Loreto	11374	2675	0.495	0.516	0	63
MA	2106201	Luís Domingues	6510	1597	0.512	0.541	0	9
MA	2106300	Magalhães de Almeida	17633	4063	0.499	0.502	0	73
MA	2106326	Maracaçumé	19142	4625	0.501	0.546	0	137
MA	2106359	Marajá do Sena	8045	1759	0.299	0.4	0	31
MA	2106375	Maranhãozinho	14066	3099	0.465	0.497	0	48
MA	2106409	Mata Roma	15123	3549	0.494	0.483	0	77
MA	2106508	Matinha	21832	5589	0.56	0.579	0	95
MA	2106607	Matões	30930	7608	0.434	0.519	0	45
MA	2106631	Matões do Norte	13796	2540	0.436	0.452	0	46
MA	2106672	Milagres do Maranhão	8118	1800	0.413	0.465	0	29
MA	2106706	Mirador	20434	4903	0.451	0.485	0	74
MA	2106755	Miranda do Norte	24331	5196	0.55	0.55	0	301
MA	2106805	Mirinzal	14213	3567	0.582	0.546	0	116
MA	2106904	Monção	31748	7480	0.464	0.499	0	81
MA	2107001	Montes Altos	9424	2398	0.486	0.534	0	57
MA	2107100	Morros	17805	3783	0.48	0.485	0	86
MA	2107209	Nina Rodrigues	12467	2541	0.547	0.474	0	38
MA	2107258	Nova Colinas	4885	1193	0.481	0.502	0	10
MA	2107308	Nova Iorque	4600	1209	0.489	0.558	0	19
MA	2107357	Nova Olinda do Maranhão	19125	4537	0.484	0.536	0	257
MA	2107407	Olho d'Água das Cunhãs	18505	4857	0.491	0.551	0	201
MA	2107456	Olinda Nova do Maranhão	13122	3264	0.531	0.495	0	37
MA	2107506	Paço do Lumiar	104881	27165	0.739	0.646	0	4245
MA	2107605	Palmeirândia	18766	4947	0.492	0.488	0	29
MA	2107704	Paraibano	20104	5301	0.473	0.572	0	206
MA	2107803	Parnarama	34613	8659	0.416	0.504	0	145
MA	2107902	Passagem Franca	17576	4593	0.401	0.525	0	128
MA	2108009	Pastos Bons	18079	4703	0.559	0.54	0	67
MA	2108058	Paulino Neves	14498	2929	0.511	0.481	0	0
MA	2108108	Paulo Ramos	20087	4774	0.447	0.546	0	188
MA	2108207	Pedreiras	39481	10744	0.621	0.644	0	1237
MA	2108256	Pedro do Rosário	22731	5336	0.415	0.475	0	21
MA	2108306	Penalva	34246	7917	0.472	0.519	0	131
MA	2108405	Peri Mirim	13807	3601	0.572	0.506	0	45
MA	2108454	Peritoró	20274	5598	0.464	0.499	0	124
MA	2108504	Pindaré-Mirim	31145	7796	0.592	0.568	0	404
MA	2108603	Pinheiro	78147	19547	0.579	0.579	0	1143
MA	2108702	Pio XII	22016	5399	0.408	0.535	0	158
MA	2108801	Pirapemas	17358	4178	0.514	0.501	0	64
MA	2108900	Poção de Pedras	19705	5309	0.481	0.543	0	150
MA	2109007	Porto Franco	21506	5692	0.606	0.664	0	722
MA	2109056	Porto Rico do Maranhão	6062	1562	0.561	0.538	0	32
MA	2109106	Presidente Dutra	44719	11944	0.563	0.628	0	1019
MA	2109205	Presidente Juscelino	11537	2495	0.532	0.452	0	3
MA	2109239	Presidente Médici	6370	1479	0.522	0.518	0	66
MA	2109270	Presidente Sarney	17143	4017	0.472	0.486	0	5
MA	2109304	Presidente Vargas	10729	2514	0.56	0.47	0	27
MA	2109403	Primeira Cruz	13896	2985	0.414	0.448	0	3
MA	2109452	Raposa	26280	6557	0.587	0.568	0	149
MA	2109502	Riachão	20218	5286	0.442	0.572	0	230
MA	2109551	Ribamar Fiquene	7294	1913	0.527	0.592	0	23
MA	2109601	Rosário	39582	9491	0.592	0.566	0	542
MA	2109700	Sambaíba	5484	1370	0.456	0.542	0	28
MA	2109759	Santa Filomena do Maranhão	7063	1753	0.435	0.461	0	2
MA	2109809	Santa Helena	39060	8829	0.471	0.531	0	164
MA	2109908	Santa Inês	78182	20331	0.615	0.633	0	2419
MA	2110005	Santa Luzia	69392	17522	0.452	0.525	0	529
MA	2110039	Santa Luzia do Paruá	22644	5391	0.51	0.583	1	358
MA	2110104	Santa Quitéria do Maranhão	29172	6364	0.458	0.49	0	133
MA	2110203	Santa Rita	32365	7953	0.551	0.553	0	269
MA	2110237	Santana do Maranhão	11661	2500	0.394	0.445	0	17
MA	2110278	Santo Amaro do Maranhão	13821	2606	0.416	0.454	0	0
MA	2110302	Santo Antônio dos Lopes	14288	3717	0.465	0.547	0	92
MA	2110401	São Benedito do Rio Preto	17802	3924	0.452	0.468	0	85
MA	2110500	São Bento	40717	9694	0.545	0.525	0	353
MA	2110609	São Bernardo	26480	6289	0.479	0.514	0	102
MA	2110658	São Domingos do Azeitão	6983	1686	0.486	0.576	0	36
MA	2110708	São Domingos do Maranhão	33630	8876	0.504	0.549	0	262
MA	2110807	São Félix de Balsas	4688	1213	0.43	0.517	0	0
MA	2110856	São Francisco do Brejão	10226	2685	0.479	0.556	0	121
MA	2110906	São Francisco do Maranhão	12163	3289	0.4	0.503	0	60
MA	2111003	São João Batista	19966	5075	0.577	0.493	0	68
MA	2111029	São João do Carú	12315	2628	0.397	0.487	0	5
MA	2111052	São João do Paraíso	10823	2876	0.542	0.554	0	93
MA	2111078	São João do Soter	17104	4268	0.401	0.486	0	5
MA	2111102	São João dos Patos	24913	7038	0.522	0.613	0	413
MA	2111201	São José de Ribamar	162925	42602	0.7	0.642	0	6099
MA	2111250	São José dos Basílios	7496	1876	0.48	0.501	0	15
MA	2111300	São Luís	1011943	278885	0.752	0.741	1	77281
MA	2111409	São Luís Gonzaga do Maranhão	20156	5236	0.438	0.503	0	211
MA	2111508	São Mateus do Maranhão	39109	9839	0.515	0.627	0	445
MA	2111532	São Pedro da Água Branca	12025	3017	0.523	0.577	0	112
MA	2111573	São Pedro dos Crentes	4428	1111	0.524	0.558	0	17
MA	2111607	São Raimundo das Mangabeiras	17480	4453	0.521	0.583	0	226
MA	2111631	São Raimundo do Doca Bezerra	6090	1398	0.41	0.478	0	20
MA	2111672	São Roberto	5957	1317	0.391	0.475	0	0
MA	2111706	São Vicente Ferrer	20870	5162	0.541	0.504	0	90
MA	2111722	Satubinha	11987	2508	0.369	0.45	0	13
MA	2111748	Senador Alexandre Costa	10253	2585	0.435	0.52	0	63
MA	2111763	Senador La Rocque	18010	4588	0.515	0.57	0	203
MA	2111789	Serrano do Maranhão	10924	2740	0.433	0.44	0	13
MA	2111805	Sítio Novo	17007	4107	0.456	0.509	0	95
MA	2111904	Sucupira do Norte	10431	2701	0.505	0.526	0	83
MA	2111953	Sucupira do Riachão	4610	1213	0.447	0.538	0	27
MA	2112001	Tasso Fragoso	7796	1946	0.491	0.562	0	20
MA	2112100	Timbiras	28007	6549	0.427	0.498	0	187
MA	2112209	Timon	155396	40669	0.579	0.614	0	3733
MA	2112233	Trizidela do Vale	18951	5119	0.534	0.565	0	254
MA	2112274	Tufilândia	5607	1373	0.481	0.502	0	17
MA	2112308	Tuntum	39257	10450	0.483	0.534	0	302
MA	2112407	Turiaçu	33956	7815	0.461	0.493	0	109
MA	2112456	Turilândia	22850	5222	0.402	0.495	0	17
MA	2112506	Tutóia	52711	11373	0.451	0.543	0	404
MA	2112605	Urbano Santos	24548	5261	0.522	0.506	0	160
MA	2112704	Vargem Grande	49415	11127	0.425	0.487	0	302
MA	2112803	Viana	49452	12399	0.548	0.567	0	299
MA	2112852	Vila Nova dos Martírios	11258	2745	0.491	0.555	0	53
MA	2112902	Vitória do Mearim	31234	7576	0.534	0.54	0	274
MA	2113009	Vitorino Freire	31654	8246	0.477	0.563	1	370
MA	2114007	Zé Doca	50160	11914	0.505	0.559	1	831
PI	2200053	Acauã	6749	1877	0.411	0.517	0	41
PI	2200103	Agricolândia	5114	1536	0.526	0.55	0	38
PI	2200202	Água Branca	16461	4733	0.569	0.6	0	359
PI	2200251	Alagoinha do Piauí	7349	2278	0.391	0.535	0	39
PI	2200277	Alegrete do Piauí	5151	1492	0.475	0.564	0	54
PI	2200301	Alto Longá	13654	3965	0.47	0.567	0	40
PI	2200400	Altos(*)	42580	11424	0.512	0.59	0	533
PI	2200459	Alvorada do Gurguéia	5051	1295	0.496	0.52	0	24
PI	2200509	Amarante	17141	4879	0.497	0.574	0	204
PI	2200608	Angical do Piauí	6670	2077	0.555	0.61	0	133
PI	2200707	Anísio de Abreu	9094	2571	0.512	0.534	0	52
PI	2200806	Antônio Almeida	3046	872	0.527	0.579	0	0
PI	2200905	Aroazes	5781	1612	0.468	0.563	0	12
PI	2201002	Arraial	4688	1250	0.449	0.514	0	41
PI	2201051	Assunção do Piauí	7503	1890	0.382	0.462	0	50
PI	2201101	Avelino Lopes	11067	3106	0.442	0.532	0	62
PI	2201150	Baixa Grande do Ribeiro	10516	2532	0.446	0.537	0	79
PI	2201176	Barra D'Alcântara	3852	1180	0.471	0.526	0	20
PI	2201200	Barras	44850	11334	0.485	0.558	0	358
PI	2201309	Barreiras do Piauí	3234	796	0.423	0.56	0	4
PI	2201408	Barro Duro	6609	1850	0.514	0.611	0	70
PI	2201507	Batalha	25786	6923	0.398	0.54	0	216
PI	2201556	Bela Vista do Piauí	3778	938	0.519	0.52	0	19
PI	2201572	Belém do Piauí	3284	933	0.448	0.537	0	21
PI	2201606	Beneditinos	9911	2775	0.394	0.561	0	82
PI	2201705	Bertolínia	5319	1462	0.507	0.596	0	25
PI	2201739	Betânia do Piauí	6015	1580	0.342	0.486	0	74
PI	2201770	Boa Hora	6299	1528	0.46	0.534	0	12
PI	2201804	Bocaina	4346	1389	0.532	0.614	0	46
PI	2201903	Bom Jesus	22632	5821	0.562	0.665	0	623
PI	2201919	Bom Princípio do Piauí	5304	1345	0.372	0.526	0	4
PI	2201929	Bonfim do Piauí	5393	1519	0.415	0.542	0	8
PI	2201945	Boqueirão do Piauí	6193	1619	0.434	0.555	0	28
PI	2201960	Brasileira	7961	2184	0.446	0.572	0	91
PI	2201988	Brejo do Piauí	3852	1153	0.354	0.531	0	8
PI	2202000	Buriti dos Lopes	19074	4879	0.452	0.544	0	197
PI	2202026	Buriti dos Montes	7977	2058	0.46	0.527	0	43
PI	2202059	Cabeceiras do Piauí	9927	2584	0.476	0.54	0	38
PI	2202075	Cajazeiras do Piauí	3343	932	0.449	0.525	0	4
PI	2202083	Cajueiro da Praia	7163	1830	0.4	0.551	0	57
PI	2202091	Caldeirão Grande do Piauí	5668	1542	0.486	0.561	0	41
PI	2202109	Campinas do Piauí	5406	1642	0.397	0.524	0	39
PI	2202117	Campo Alegre do Fidalgo	4696	1262	0.385	0.528	0	15
PI	2202133	Campo Grande do Piauí	5592	1614	0.446	0.545	0	38
PI	2202174	Campo Largo do Piauí	6803	1686	0.401	0.479	0	5
PI	2202208	Campo Maior	45180	12988	0.566	0.629	0	1273
PI	2202251	Canavieira	3922	1091	0.485	0.525	0	3
PI	2202307	Canto do Buriti	20035	5859	0.462	0.571	0	239
PI	2202406	Capitão de Campos	10956	2966	0.465	0.552	0	172
PI	2202455	Capitão Gervásio Oliveira	3876	1147	0.464	0.503	0	9
PI	2202505	Caracol	10212	2701	0.409	0.533	0	28
PI	2202539	Caraúbas do Piauí	5522	1455	0.347	0.48	0	14
PI	2202554	Caridade do Piauí	4825	1217	0.426	0.52	0	25
PI	2202604	Castelo do Piauí	18338	5087	0.473	0.566	0	218
PI	2202653	Caxingó	5039	1267	0.329	0.498	0	0
PI	2202703	Cocal	26044	6733	0.334	0.516	0	217
PI	2202711	Cocal de Telha	4525	1329	0.399	0.55	0	48
PI	2202729	Cocal dos Alves	5572	1559	0.315	0.504	0	41
PI	2202737	Coivaras	3811	1021	0.453	0.543	0	10
PI	2202752	Colônia do Gurguéia	6035	1705	0.55	0.578	0	66
PI	2202778	Colônia do Piauí	7433	2011	0.462	0.57	0	38
PI	2202802	Conceição do Canindé	4484	1278	0.482	0.559	0	54
PI	2202851	Coronel José Dias	4541	1328	0.433	0.518	0	0
PI	2202901	Corrente	25408	6695	0.54	0.62	0	573
PI	2203008	Cristalândia do Piauí	7831	2019	0.469	0.521	0	20
PI	2203107	Cristino Castro	9981	2645	0.434	0.586	0	161
PI	2203206	Curimatá	10765	2935	0.527	0.574	0	93
PI	2203230	Currais	4704	1133	0.438	0.49	0	0
PI	2203255	Curralinhos	4182	1104	0.438	0.512	0	14
PI	2203271	Curral Novo do Piauí	4870	1179	0.422	0.506	0	9
PI	2203305	Demerval Lobão	13274	3801	0.515	0.588	0	141
PI	2203354	Dirceu Arcoverde	6677	1872	0.436	0.563	0	26
PI	2203404	Dom Expedito Lopes	6587	1929	0.488	0.583	0	93
PI	2203420	Domingos Mourão	4264	1106	0.403	0.547	0	14
PI	2203453	Dom Inocêncio	9246	2560	0.439	0.498	0	39
PI	2203503	Elesbão Veloso	14499	4327	0.45	0.573	1	141
PI	2203602	Eliseu Martins	4667	1335	0.462	0.616	0	70
PI	2203701	Esperantina	37765	10184	0.497	0.579	0	639
PI	2203750	Fartura do Piauí	5076	1327	0.441	0.506	0	18
PI	2203800	Flores do Piauí	4368	1303	0.443	0.525	0	55
PI	2203859	Floresta do Piauí	2482	743	0.391	0.53	0	15
PI	2203909	Floriano	57707	16259	0.633	0.676	0	2660
PI	2204006	Francinópolis	5230	1534	0.475	0.523	0	36
PI	2204105	Francisco Ayres	4483	1326	0.45	0.565	0	9
PI	2204154	Francisco Macedo	2879	795	0.425	0.567	0	30
PI	2204204	Francisco Santos	8619	2492	0.498	0.598	0	110
PI	2204303	Fronteiras	11122	3100	0.511	0.621	0	191
PI	2204352	Geminiano	5475	1572	0.446	0.524	0	8
PI	2204402	Gilbués	10393	2555	0.38	0.574	0	67
PI	2204501	Guadalupe	10268	2807	0.542	0.639	0	242
PI	2204550	Guaribas	4401	1073	0.381	0.483	0	4
PI	2204600	Hugo Napoleão	3771	1080	0.524	0.528	0	24
PI	2204659	Ilha Grande	8914	2204	0.472	0.534	0	94
PI	2204709	Inhuma	14868	4175	0.56	0.562	0	245
PI	2204808	Ipiranga do Piauí	9326	2566	0.583	0.56	0	90
PI	2204907	Isaías Coelho	8218	2198	0.41	0.628	0	41
PI	2205003	Itainópolis	11099	3396	0.401	0.545	0	73
PI	2205102	Itaueira	10677	3111	0.46	0.594	0	122
PI	2205151	Jacobina do Piauí	5719	1602	0.416	0.509	0	35
PI	2205201	Jaicós	18008	5070	0.366	0.556	0	203
PI	2205250	Jardim do Mulato	4309	1235	0.55	0.532	0	24
PI	2205276	Jatobá do Piauí	4637	1303	0.442	0.525	0	28
PI	2205300	Jerumenha	4383	1238	0.461	0.569	0	23
PI	2205359	João Costa	2960	817	0.46	0.51	0	3
PI	2205409	Joaquim Pires	13822	3418	0.384	0.485	0	21
PI	2205458	Joca Marques	5100	1271	0.353	0.501	0	8
PI	2205508	José de Freitas	37095	9250	0.512	0.591	0	358
PI	2205516	Juazeiro do Piauí	4757	1240	0.47	0.522	0	27
PI	2205524	Júlio Borges	5377	1370	0.508	0.5	0	14
PI	2205532	Jurema	4517	1265	0.435	0.511	0	4
PI	2205540	Lagoinha do Piauí	2656	781	0.488	0.561	0	23
PI	2205557	Lagoa Alegre	8008	1964	0.425	0.538	0	17
PI	2205565	Lagoa do Barro do Piauí	4523	1164	0.358	0.474	0	42
PI	2205573	Lagoa de São Francisco	6422	1666	0.4	0.499	0	36
PI	2205581	Lagoa do Piauí	3863	1065	0.464	0.548	0	13
PI	2205599	Lagoa do Sítio	4853	1463	0.421	0.504	0	3
PI	2205607	Landri Sales	5281	1577	0.48	0.563	0	20
PI	2205706	Luís Correia	28422	7099	0.398	0.544	1	197
PI	2205805	Luzilândia	24711	6519	0.42	0.55	0	291
PI	2205854	Madeiro	7816	1828	0.489	0.472	0	18
PI	2205904	Manoel Emídio	5209	1393	0.466	0.534	0	86
PI	2205953	Marcolândia	7810	2213	0.438	0.578	0	98
PI	2206001	Marcos Parente	4456	1271	0.494	0.58	0	24
PI	2206050	Massapê do Piauí	6222	1639	0.386	0.514	0	20
PI	2206100	Matias Olímpio	10485	2690	0.438	0.521	0	63
PI	2206209	Miguel Alves	32292	7709	0.396	0.533	0	205
PI	2206308	Miguel Leão	1253	336	0.533	0.579	0	15
PI	2206357	Milton Brandão	6770	1713	0.357	0.476	0	36
PI	2206407	Monsenhor Gil	10337	2856	0.524	0.568	0	89
PI	2206506	Monsenhor Hipólito	7391	2149	0.404	0.591	0	78
PI	2206605	Monte Alegre do Piauí	10349	2439	0.474	0.531	0	63
PI	2206654	Morro Cabeça no Tempo	4068	1009	0.435	0.472	0	13
PI	2206670	Morro do Chapéu do Piauí	6499	1678	0.418	0.536	0	9
PI	2206696	Murici dos Portelas	8464	2074	0.391	0.489	0	8
PI	2206704	Nazaré do Piauí	7327	2101	0.51	0.531	0	88
PI	2206753	Nossa Senhora de Nazaré	4560	1234	0.462	0.557	0	16
PI	2206803	Nossa Senhora dos Remédios	8214	2066	0.411	0.503	0	10
PI	2206902	Novo Oriente do Piauí	6498	1939	0.418	0.547	0	34
PI	2206951	Novo Santo Antônio	3260	914	0.392	0.536	0	23
PI	2207009	Oeiras	35646	10471	0.547	0.619	0	917
PI	2207108	Olho D'Água do Piauí	2630	756	0.477	0.537	0	16
PI	2207207	Padre Marcos	6651	2021	0.427	0.531	0	52
PI	2207306	Paes Landim	4059	1080	0.492	0.537	0	41
PI	2207355	Pajeú do Piauí	3366	1032	0.427	0.56	0	21
PI	2207405	Palmeira do Piauí	4993	1310	0.431	0.57	0	6
PI	2207504	Palmeirais	13745	3778	0.443	0.515	0	38
PI	2207553	Paquetá	4147	1168	0.348	0.519	0	0
PI	2207603	Parnaguá	10265	2477	0.464	0.526	0	19
PI	2207702	Parnaíba	145729	38906	0.604	0.658	0	6554
PI	2207751	Passagem Franca do Piauí	4546	1118	0.393	0.594	0	25
PI	2207777	Patos do Piauí	6106	1832	0.448	0.529	0	19
PI	2207801	Paulistana	19783	5551	0.472	0.596	0	542
PI	2207850	Pavussu	3666	1060	0.379	0.512	0	0
PI	2207900	Pedro II	37500	9806	0.428	0.566	0	515
PI	2207934	Pedro Laurentino	2410	655	0.496	0.479	0	11
PI	2207959	Nova Santa Rita	4192	1136	0.425	0.52	0	10
PI	2208007	Picos(*)	75859	21956	0.621	0.684	0	3461
PI	2208106	Pimenteiras	11713	3191	0.423	0.553	0	109
PI	2208205	Pio IX	17693	4915	0.44	0.538	0	242
PI	2208304	Piracuruca	27548	7744	0.478	0.575	1	526
PI	2208403	Piripiri	61840	17029	0.533	0.621	0	1548
PI	2208502	Porto	11897	2791	0.406	0.537	0	58
PI	2208551	Porto Alegre do Piauí	2559	677	0.452	0.539	0	10
PI	2208601	Prata do Piauí	3085	891	0.448	0.527	0	5
PI	2208650	Queimada Nova	8565	2193	0.368	0.49	0	46
PI	2208700	Redenção do Gurguéia	8403	2057	0.478	0.557	0	10
PI	2208809	Regeneração	17576	4949	0.498	0.582	0	152
PI	2208858	Riacho Frio	4238	1123	0.431	0.483	0	16
PI	2208874	Ribeira do Piauí	4263	1224	0.368	0.505	0	12
PI	2208908	Ribeiro Gonçalves	6841	1658	0.485	0.568	0	59
PI	2209005	Rio Grande do Piauí	6429	1865	0.442	0.552	0	58
PI	2209104	Santa Cruz do Piauí	6025	1682	0.53	0.57	0	137
PI	2209153	Santa Cruz dos Milagres	3794	1054	0.509	0.524	0	5
PI	2209203	Santa Filomena	6096	1531	0.385	0.53	0	62
PI	2209302	Santa Luz	5513	1466	0.49	0.539	0	42
PI	2209351	Santana do Piauí	4920	1419	0.476	0.539	0	17
PI	2209377	Santa Rosa do Piauí	5149	1551	0.483	0.539	0	29
PI	2209401	Santo Antônio de Lisboa	6008	1784	0.473	0.597	0	68
PI	2209450	Santo Antônio dos Milagres	2058	533	0.582	0.524	0	4
PI	2209500	Santo Inácio do Piauí	3653	1126	0.546	0.543	0	27
PI	2209559	São Braz do Piauí	4313	1234	0.514	0.533	0	3
PI	2209609	São Félix do Piauí	3069	960	0.52	0.587	0	10
PI	2209658	São Francisco de Assis do Piauí	5575	1504	0.336	0.462	0	8
PI	2209708	São Francisco do Piauí	6301	1818	0.448	0.557	0	36
PI	2209757	São Gonçalo do Gurguéia	2825	723	0.438	0.572	0	9
PI	2209807	São Gonçalo do Piauí	4754	1342	0.588	0.538	0	110
PI	2209856	São João da Canabrava	4445	1376	0.446	0.539	0	27
PI	2209872	São João da Fronteira	5608	1516	0.351	0.516	0	17
PI	2209906	São João da Serra	6157	1791	0.478	0.545	0	47
PI	2209955	São João da Varjota	4648	1268	0.46	0.536	0	25
PI	2209971	São João do Arraial	7337	1926	0.401	0.496	0	56
PI	2210003	São João do Piauí	19553	5379	0.567	0.615	0	543
PI	2210052	São José do Divino	5141	1389	0.44	0.529	0	65
PI	2210102	São José do Peixe	3700	1066	0.449	0.548	0	6
PI	2210201	São José do Piauí	6608	1930	0.423	0.569	0	13
PI	2210300	São Julião	5677	1739	0.455	0.593	0	69
PI	2210359	São Lourenço do Piauí	4423	1298	0.499	0.56	0	0
PI	2210375	São Luis do Piauí	2561	746	0.433	0.52	0	4
PI	2210383	São Miguel da Baixa Grande	2113	622	0.413	0.557	0	6
PI	2210391	São Miguel do Fidalgo	2976	818	0.407	0.505	0	2
PI	2210409	São Miguel do Tapuio	18149	4983	0.434	0.508	0	267
PI	2210508	São Pedro do Piauí	13645	3772	0.492	0.553	0	132
PI	2210607	São Raimundo Nonato	32347	9311	0.587	0.631	0	851
PI	2210623	Sebastião Barros	3559	896	0.394	0.508	0	3
PI	2210631	Sebastião Leal	4116	1138	0.467	0.516	0	6
PI	2210656	Sigefredo Pacheco	9619	2758	0.496	0.518	0	70
PI	2210706	Simões	14185	3667	0.44	0.56	0	177
PI	2210805	Simplício Mendes	12078	3429	0.525	0.613	0	274
PI	2210904	Socorro do Piauí	4528	1282	0.465	0.513	0	3
PI	2210938	Sussuapara	6235	1812	0.476	0.563	0	29
PI	2210953	Tamboril do Piauí	2755	761	0.36	0.509	0	22
PI	2210979	Tanque do Piauí	2621	809	0.499	0.553	0	19
PI	2211001	Teresina(*)	822478	226392	0.707	0.731	1	60197
PI	2211100	União	42657	10847	0.453	0.542	0	286
PI	2211209	Uruçuí	20152	5254	0.516	0.614	0	451
PI	2211308	Valença do Piauí	20325	6153	0.566	0.62	0	422
PI	2211357	Várzea Branca	4913	1280	0.44	0.518	0	3
PI	2211407	Várzea Grande	4336	1382	0.474	0.554	0	81
PI	2211506	Vera Mendes	2987	924	0.375	0.494	0	8
PI	2211605	Vila Nova do Piauí	3076	937	0.471	0.559	0	18
PI	2211704	Wall Ferraz	4280	1151	0.443	0.513	0	17
CE	2300101	Abaiara	10489	2791	0.612	0.54	0	80
CE	2300150	Acarape	15337	4186	0.562	0.559	0	100
CE	2300200	Acaraú	57542	14758	0.517	0.554	0	851
CE	2300309	Acopiara	51171	15084	0.517	0.563	0	606
CE	2300408	Aiuaba	16207	4451	0.474	0.518	0	85
CE	2300507	Alcântaras	10773	2859	0.524	0.549	0	71
CE	2300606	Altaneira	6851	2093	0.515	0.547	0	78
CE	2300705	Alto Santo	16360	4609	0.499	0.563	0	223
CE	2300754	Amontada	39233	9819	0.582	0.503	0	283
CE	2300804	Antonina do Norte	6984	2005	0.506	0.55	0	131
CE	2300903	Apuiarés	13927	3895	0.593	0.536	0	184
CE	2301000	Aquiraz	72651	20054	0.55	0.608	0	1747
CE	2301109	Aracati	69167	19892	0.624	0.607	0	2082
CE	2301208	Aracoiaba	25405	7052	0.556	0.55	0	308
CE	2301257	Ararendá	10500	3085	0.516	0.522	0	135
CE	2301307	Araripe	20689	5570	0.459	0.515	0	258
CE	2301406	Aratuba	11529	2924	0.587	0.53	0	70
CE	2301505	Arneiroz	7657	2113	0.564	0.565	0	36
CE	2301604	Assaré	22448	6415	0.482	0.573	1	293
CE	2301703	Aurora	24573	7129	0.521	0.557	0	395
CE	2301802	Baixio	6026	1718	0.575	0.563	0	193
CE	2301851	Banabuiú	17320	4587	0.53	0.54	0	270
CE	2301901	Barbalha	55373	14719	0.637	0.613	0	1802
CE	2301950	Barreira	19574	5545	0.551	0.551	0	147
CE	2302008	Barro	21528	6110	0.51	0.556	0	317
CE	2302057	Barroquinha	14475	3707	0.505	0.512	0	173
CE	2302107	Baturité	33326	9211	0.548	0.574	0	746
CE	2302206	Beberibe	49334	14143	0.571	0.585	0	857
CE	2302305	Bela Cruz	30873	8079	0.598	0.533	1	614
CE	2302404	Boa Viagem	52521	15212	0.504	0.553	0	781
CE	2302503	Brejo Santo	45190	12141	0.592	0.596	0	1157
CE	2302602	Camocim	60163	15766	0.578	0.565	0	1154
CE	2302701	Campos Sales	26510	7638	0.556	0.584	0	429
CE	2302800	Canindé	74486	20086	0.526	0.571	0	1566
CE	2302909	Capistrano	17063	4597	0.593	0.527	0	165
CE	2303006	Caridade	20020	5251	0.505	0.528	0	111
CE	2303105	Cariré	18348	5113	0.526	0.537	0	388
CE	2303204	Caririaçu	26387	7078	0.483	0.549	0	339
CE	2303303	Cariús	18567	5541	0.519	0.546	0	152
CE	2303402	Carnaubal	16746	4575	0.513	0.536	0	272
CE	2303501	Cascavel	66124	18882	0.578	0.587	0	1395
CE	2303600	Catarina	18745	5028	0.56	0.551	0	165
CE	2303659	Catunda	9951	2750	0.587	0.537	0	116
CE	2303709	Caucaia	324738	90093	0.632	0.62	0	12343
CE	2303808	Cedro	24538	7244	0.553	0.592	0	582
CE	2303907	Chaval	12617	3216	0.536	0.524	0	113
CE	2303931	Choró	12853	3288	0.523	0.493	0	79
CE	2303956	Chorozinho	18920	5491	0.522	0.57	0	213
CE	2304004	Coreaú	22018	5942	0.568	0.526	0	278
CE	2304103	Crateús	72853	21833	0.55	0.618	0	2104
CE	2304202	Crato	121462	34149	0.673	0.655	0	6049
CE	2304236	Croatá	17077	4848	0.544	0.497	0	185
CE	2304251	Cruz	22480	6205	0.586	0.573	1	828
CE	2304269	Deputado Irapuan Pinheiro	9094	2771	0.562	0.542	0	115
CE	2304277	Ererê	6853	1891	0.547	0.551	0	110
CE	2304285	Eusébio	46047	12799	0.621	0.7	0	1893
CE	2304301	Farias Brito	19007	5402	0.605	0.541	0	232
CE	2304350	Forquilha	21786	6183	0.602	0.583	0	497
CE	2304400	Fortaleza	2447409	714453	0.695	0.749	1	213931
CE	2304459	Fortim	14851	4182	0.588	0.562	0	252
CE	2304509	Frecheirinha	12991	3761	0.536	0.551	0	278
CE	2304608	General Sampaio	6216	1579	0.449	0.548	0	29
CE	2304657	Graça	15052	4291	0.477	0.514	0	159
CE	2304707	Granja	52670	13246	0.453	0.495	1	572
CE	2304806	Granjeiro	4626	1175	0.526	0.533	0	34
CE	2304905	Groaíras	10228	3014	0.598	0.585	0	306
CE	2304954	Guaiúba	24091	6408	0.56	0.546	0	283
CE	2305001	Guaraciaba do Norte	37777	10230	0.528	0.552	0	743
CE	2305100	Guaramiranga	4165	1076	0.61	0.576	0	58
CE	2305209	Hidrolândia	19342	5621	0.499	0.549	0	446
CE	2305233	Horizonte	55154	15728	0.61	0.594	0	1008
CE	2305266	Ibaretama	12928	3456	0.489	0.517	0	71
CE	2305308	Ibiapina	23810	6473	0.525	0.559	0	338
CE	2305332	Ibicuitinga	11335	3231	0.571	0.514	0	134
CE	2305357	Icapuí	18393	5261	0.541	0.572	1	296
CE	2305407	Icó	65453	18278	0.536	0.568	0	1056
CE	2305506	Iguatu	96523	28865	0.599	0.642	0	3324
CE	2305605	Independência	25586	7533	0.592	0.561	0	259
CE	2305654	Ipaporanga	11335	3494	0.506	0.502	0	80
CE	2305704	Ipaumirim	12014	3546	0.491	0.621	0	284
CE	2305803	Ipu	40300	11328	0.532	0.583	0	751
CE	2305902	Ipueiras	37874	10971	0.479	0.534	0	626
CE	2306009	Iracema	13725	3998	0.632	0.597	0	329
CE	2306108	Irauçuba	22347	5617	0.557	0.526	0	220
CE	2306207	Itaiçaba	7321	2307	0.642	0.581	0	140
CE	2306256	Itaitinga	35838	10595	0.548	0.583	0	521
CE	2306306	Itapagé	48366	12977	0.568	0.561	0	910
CE	2306405	Itapipoca	116065	30060	0.613	0.562	0	2255
CE	2306504	Itapiúna	18626	4945	0.542	0.525	0	165
CE	2306553	Itarema	37462	8968	0.558	0.529	0	214
CE	2306603	Itatira	18894	4794	0.463	0.514	0	175
CE	2306702	Jaguaretama	17867	5190	0.535	0.552	0	317
CE	2306801	Jaguaribara	10405	2867	0.559	0.575	0	268
CE	2306900	Jaguaribe	34416	10168	0.543	0.58	0	861
CE	2307007	Jaguaruana	32239	9673	0.548	0.568	0	445
CE	2307106	Jardim	26697	6845	0.542	0.547	0	386
CE	2307205	Jati	7649	2192	0.634	0.562	0	88
CE	2307254	Jijoca de Jericoacoara	17002	4890	0.625	0.614	0	527
CE	2307304	Juazeiro do Norte	249936	69968	0.642	0.644	0	10275
CE	2307403	Jucás	23809	6784	0.511	0.541	0	306
CE	2307502	Lavras da Mangabeira	31096	8699	0.515	0.576	0	625
CE	2307601	Limoeiro do Norte	56281	17234	0.623	0.633	0	2563
CE	2307635	Madalena	18085	4826	0.545	0.536	0	252
CE	2307650	Maracanaú	209748	58053	0.665	0.617	0	7166
CE	2307700	Maranguape	112926	29303	0.618	0.587	0	2468
CE	2307809	Marco	24707	6032	0.553	0.564	0	390
CE	2307908	Martinópole	10220	2716	0.522	0.541	0	146
CE	2308005	Massapê	35201	9279	0.554	0.541	0	729
CE	2308104	Mauriti	44217	11665	0.526	0.544	0	534
CE	2308203	Meruoca	13693	3531	0.554	0.559	0	249
CE	2308302	Milagres	28317	7878	0.569	0.561	1	559
CE	2308351	Milhã	13078	3848	0.558	0.56	0	322
CE	2308377	Miraíma	12800	3241	0.523	0.51	0	123
CE	2308401	Missão Velha	34258	9091	0.552	0.579	0	471
CE	2308500	Mombaça	42707	12053	0.489	0.549	0	511
CE	2308609	Monsenhor Tabosa	16706	4780	0.538	0.545	0	181
CE	2308708	Morada Nova	62086	18293	0.525	0.569	0	1248
CE	2308807	Moraújo	8069	2129	0.516	0.495	0	46
CE	2308906	Morrinhos	20703	5346	0.511	0.524	0	374
CE	2309003	Mucambo	14102	4230	0.541	0.565	0	284
CE	2309102	Mulungu	11485	2935	0.534	0.551	0	81
CE	2309201	Nova Olinda	14256	3988	0.554	0.567	0	174
CE	2309300	Nova Russas	30977	9353	0.524	0.585	0	900
CE	2309409	Novo Oriente	27461	8041	0.526	0.552	0	311
CE	2309458	Ocara	24012	6804	0.519	0.524	0	127
CE	2309508	Orós	21392	6571	0.557	0.582	0	246
CE	2309607	Pacajus	61846	17618	0.596	0.609	0	1356
CE	2309706	Pacatuba	72249	18794	0.652	0.605	0	1870
CE	2309805	Pacoti	11607	3072	0.58	0.571	0	142
CE	2309904	Pacujá	5986	1756	0.571	0.562	0	118
CE	2310001	Palhano	8869	2615	0.628	0.572	0	100
CE	2310100	Palmácia	12005	3087	0.551	0.59	0	117
CE	2310209	Paracuru	31638	8770	0.581	0.597	0	563
CE	2310258	Paraipaba	30041	8232	0.602	0.574	1	268
CE	2310308	Parambu	31320	9011	0.46	0.526	0	188
CE	2310407	Paramoti	11308	3025	0.518	0.515	0	65
CE	2310506	Pedra Branca	41942	11963	0.521	0.541	0	593
CE	2310605	Penaforte	8226	2302	0.626	0.566	0	126
CE	2310704	Pentecoste	35412	9888	0.604	0.562	0	548
CE	2310803	Pereiro	15764	4366	0.534	0.525	0	257
CE	2310852	Pindoretama	18691	5365	0.588	0.581	0	297
CE	2310902	Piquet Carneiro	15501	4456	0.523	0.53	0	132
CE	2310951	Pires Ferreira	10216	2790	0.526	0.51	0	115
CE	2311009	Poranga	12003	3409	0.5	0.527	0	184
CE	2311108	Porteiras	15065	4150	0.592	0.531	0	158
CE	2311207	Potengi	10276	2837	0.441	0.529	0	109
CE	2311231	Potiretama	6129	1714	0.538	0.544	0	66
CE	2311264	Quiterianópolis	19918	5724	0.518	0.524	0	138
CE	2311306	Quixadá	80605	22392	0.624	0.592	0	2768
CE	2311355	Quixelô	15000	4668	0.52	0.548	0	171
CE	2311405	Quixeramobim	71912	20638	0.567	0.592	0	1650
CE	2311504	Quixeré	19422	5903	0.556	0.56	0	377
CE	2311603	Redenção	26423	7450	0.577	0.567	0	225
CE	2311702	Reriutaba	19460	5594	0.509	0.56	0	515
CE	2311801	Russas	69892	20493	0.626	0.617	0	2070
CE	2311900	Saboeiro	15754	4511	0.499	0.533	0	118
CE	2311959	Salitre	15453	3937	0.434	0.497	0	69
CE	2312007	Santana do Acaraú	29977	7528	0.5	0.536	0	404
CE	2312106	Santana do Cariri	17181	4527	0.557	0.527	0	168
CE	2312205	Santa Quitéria	42759	11873	0.553	0.546	0	762
CE	2312304	São Benedito	44186	12141	0.531	0.562	0	785
CE	2312403	São Gonçalo do Amarante	43947	12056	0.646	0.587	0	1102
CE	2312502	São João do Jaguaribe	7902	2586	0.576	0.62	0	214
CE	2312601	São Luís do Curu	12336	3592	0.593	0.558	0	170
CE	2312700	Senador Pompeu	26494	7968	0.537	0.574	0	602
CE	2312809	Senador Sá	6852	1832	0.565	0.528	0	97
CE	2312908	Sobral	188271	51211	0.675	0.647	0	9350
CE	2313005	Solonópole	17657	5322	0.574	0.565	0	287
CE	2313104	Tabuleiro do Norte	29210	9170	0.547	0.62	0	1030
CE	2313203	Tamboril	25455	6928	0.476	0.526	0	270
CE	2313252	Tarrafas	8910	2494	0.482	0.529	0	51
CE	2313302	Tauá	55755	16330	0.56	0.585	0	1083
CE	2313351	Tejuçuoca	16836	4304	0.52	0.517	0	81
CE	2313401	Tianguá	68901	18302	0.587	0.628	0	1485
CE	2313500	Trairi	51432	13429	0.577	0.522	0	366
CE	2313559	Tururu	14415	3827	0.576	0.508	0	100
CE	2313609	Ubajara	31792	8800	0.594	0.595	0	628
CE	2313708	Umari	7545	2160	0.497	0.535	0	101
CE	2313757	Umirim	18807	4790	0.524	0.514	0	124
CE	2313807	Uruburetama	19765	5281	0.608	0.564	0	235
CE	2313906	Uruoca	12894	3560	0.485	0.503	0	105
CE	2313955	Varjota	17584	4900	0.545	0.575	0	527
CE	2314003	Várzea Alegre	38442	11578	0.576	0.569	0	575
CE	2314102	Viçosa do Ceará	54961	13581	0.475	0.521	0	313
RN	2400109	Acari	11035	3330	0.634	0.633	0	479
RN	2400208	Açu	53245	14923	0.568	0.641	0	2494
RN	2400307	Afonso Bezerra	10879	2948	0.502	0.56	0	191
RN	2400406	Água Nova	2984	796	0.572	0.527	0	48
RN	2400505	Alexandria	13475	3945	0.491	0.581	0	395
RN	2400604	Almino Afonso	4880	1442	0.568	0.578	0	124
RN	2400703	Alto do Rodrigues	12306	3601	0.585	0.647	0	581
RN	2400802	Angicos	11553	3277	0.53	0.606	1	480
RN	2400901	Antônio Martins	6907	2098	0.458	0.554	0	171
RN	2401008	Apodi	34777	10039	0.571	0.611	0	1483
RN	2401107	Areia Branca	25263	7285	0.621	0.647	0	1405
RN	2401206	Arês	12931	3467	0.523	0.587	0	136
RN	2401305	Augusto Severo	9289	2614	0.495	0.624	0	166
RN	2401404	Baía Formosa	8569	2194	0.534	0.59	0	216
RN	2401453	Baraúna	24187	6770	0.446	0.562	0	373
RN	2401503	Barcelona	3957	1142	0.442	0.564	0	54
RN	2401602	Bento Fernandes	5110	1311	0.494	0.542	0	35
RN	2401651	Bodó	2425	695	0.565	0.57	0	58
RN	2401701	Bom Jesus	9432	2696	0.46	0.583	0	145
RN	2401800	Brejinho	11577	3297	0.492	0.585	0	176
RN	2401859	Caiçara do Norte	6016	1614	0.454	0.572	0	84
RN	2401909	Caiçara do Rio do Vento	3304	895	0.499	0.553	0	45
RN	2402006	Caicó	62727	19081	0.619	0.703	0	4400
RN	2402105	Campo Redondo	10266	2877	0.584	0.554	0	139
RN	2402204	Canguaretama	30900	7728	0.486	0.557	0	544
RN	2402303	Caraúbas	19582	5919	0.556	0.594	0	840
RN	2402402	Carnaúba dos Dantas	7429	2264	0.577	0.624	0	300
RN	2402501	Carnaubais	9775	2773	0.476	0.583	0	171
RN	2402600	Ceará-Mirim	67844	17464	0.505	0.599	0	1488
RN	2402709	Cerro Corá	10916	3056	0.518	0.573	0	216
RN	2402808	Coronel Ezequiel	5405	1575	0.476	0.545	0	72
RN	2402907	Coronel João Pessoa	4774	1275	0.471	0.549	0	96
RN	2403004	Cruzeta	7968	2472	0.621	0.602	0	297
RN	2403103	Currais Novos	42668	12560	0.617	0.673	0	2503
RN	2403202	Doutor Severiano	6495	1778	0.566	0.567	0	119
RN	2403251	Parnamirim	202413	61160	0.726	0.75	0	23162
RN	2403301	Encanto	5228	1482	0.536	0.589	0	141
RN	2403400	Equador	5822	1730	0.546	0.578	0	164
RN	2403509	Espírito Santo	10480	2960	0.423	0.549	0	80
RN	2403608	Extremoz	24550	6532	0.555	0.64	0	731
RN	2403707	Felipe Guerra	5734	1681	0.575	0.582	0	203
RN	2403756	Fernando Pedroza	2850	856	0.519	0.565	0	98
RN	2403806	Florânia	8959	2548	0.56	0.611	0	264
RN	2403905	Francisco Dantas	2874	838	0.523	0.582	0	82
RN	2404002	Frutuoso Gomes	4233	1302	0.512	0.565	0	157
RN	2404101	Galinhos	2150	578	0.429	0.578	0	33
RN	2404200	Goianinha	22467	5610	0.537	0.619	0	475
RN	2404309	Governador Dix-Sept Rosado	12373	3469	0.485	0.564	0	321
RN	2404408	Grossos	9393	2830	0.585	0.633	0	347
RN	2404507	Guamaré	12431	3332	0.505	0.632	0	327
RN	2404606	Ielmo Marinho	12188	3353	0.418	0.521	0	23
RN	2404705	Ipanguaçu	13855	3791	0.518	0.568	0	264
RN	2404804	Ipueira	2074	642	0.633	0.627	0	73
RN	2404853	Itajá	6952	1887	0.539	0.586	0	150
RN	2404903	Itaú	5568	1676	0.542	0.588	0	223
RN	2405009	Jaçanã	7925	2323	0.509	0.559	0	237
RN	2405108	Jandaíra	6796	1867	0.462	0.561	0	42
RN	2405207	Janduís	5350	1518	0.529	0.567	0	141
RN	2405306	Januário Cicco	9009	2469	0.481	0.511	0	21
RN	2405405	Japi	5522	1601	0.48	0.528	0	68
RN	2405504	Jardim de Angicos	2607	732	0.437	0.557	0	28
RN	2405603	Jardim de Piranhas	13511	3862	0.469	0.59	0	415
RN	2405702	Jardim do Seridó	12115	3863	0.584	0.647	0	571
RN	2405801	João Câmara	32203	8572	0.484	0.6	0	709
RN	2405900	João Dias	2601	752	0.39	0.495	0	54
RN	2406007	José da Penha	5868	1808	0.489	0.583	0	157
RN	2406106	Jucurutu	17692	5297	0.492	0.583	0	494
RN	2406205	Lagoa d'Anta	6228	1690	0.507	0.58	0	100
RN	2406304	Lagoa de Pedras	6992	1960	0.436	0.529	0	69
RN	2406403	Lagoa de Velhos	2674	755	0.458	0.566	0	38
RN	2406502	Lagoa Nova	13990	3688	0.483	0.542	0	229
RN	2406601	Lagoa Salgada	7565	2094	0.464	0.551	0	66
RN	2406700	Lajes	10385	2960	0.557	0.578	0	218
RN	2406809	Lajes Pintadas	4614	1314	0.568	0.559	0	80
RN	2406908	Lucrécia	3633	1062	0.551	0.624	0	156
RN	2407005	Luís Gomes	9612	2604	0.531	0.545	0	211
RN	2407104	Macaíba	69538	19614	0.545	0.613	0	1942
RN	2407203	Macau	28974	8557	0.572	0.65	0	1197
RN	2407252	Major Sales	3536	1004	0.529	0.573	0	121
RN	2407302	Marcelino Vieira	8265	2400	0.51	0.571	0	159
RN	2407401	Martins	8228	2415	0.538	0.58	0	415
RN	2407500	Maxaranguape	10442	2629	0.506	0.582	0	144
RN	2407609	Messias Targino	4188	1184	0.565	0.608	0	67
RN	2407708	Montanhas	11418	3103	0.447	0.553	0	250
RN	2407807	Monte Alegre	20670	5718	0.507	0.578	0	210
RN	2407906	Monte das Gameleiras	2266	655	0.509	0.56	0	42
RN	2408003	Mossoró	259886	74111	0.663	0.694	0	19029
RN	2408102	Natal	803811	237251	0.694	0.768	1	83408
RN	2408201	Nísia Floresta	23818	6946	0.518	0.601	0	524
RN	2408300	Nova Cruz	35541	9874	0.537	0.589	0	797
RN	2408409	Olho-d'Água do Borges	4301	1291	0.482	0.577	0	89
RN	2408508	Ouro Branco	4699	1389	0.558	0.61	0	254
RN	2408607	Paraná	3952	1123	0.496	0.532	0	68
RN	2408706	Paraú	3862	1112	0.522	0.582	0	81
RN	2408805	Parazinho	4845	1216	0.424	0.543	0	32
RN	2408904	Parelhas	20347	6104	0.617	0.625	0	996
RN	2408953	Rio do Fogo	10060	2595	0.457	0.546	0	105
RN	2409100	Passa e Fica	11111	3073	0.516	0.565	0	180
RN	2409209	Passagem	2899	845	0.501	0.547	0	32
RN	2409308	Patu	11964	3661	0.513	0.599	0	429
RN	2409332	Santa Maria	4762	1315	0.477	0.554	0	63
RN	2409407	Pau dos Ferros	27733	8145	0.584	0.666	0	1798
RN	2409506	Pedra Grande	3521	915	0.43	0.526	0	30
RN	2409605	Pedra Preta	2583	668	0.435	0.53	0	15
RN	2409704	Pedro Avelino	7168	1993	0.435	0.577	0	59
RN	2409803	Pedro Velho	14119	3830	0.442	0.562	0	183
RN	2409902	Pendências	13436	3866	0.526	0.633	0	298
RN	2410009	Pilões	3453	960	0.527	0.566	0	89
RN	2410108	Poço Branco	13947	3383	0.471	0.562	0	119
RN	2410207	Portalegre	7297	2143	0.547	0.581	0	160
RN	2410256	Porto do Mangue	5217	1455	0.504	0.558	0	52
RN	2410306	Presidente Juscelino	8774	2319	0.453	0.552	0	114
RN	2410405	Pureza	8432	2162	0.456	0.516	0	38
RN	2410504	Rafael Fernandes	4692	1350	0.518	0.588	0	109
RN	2410603	Rafael Godeiro	3070	959	0.607	0.583	0	115
RN	2410702	Riacho da Cruz	3165	920	0.487	0.545	0	71
RN	2410801	Riacho de Santana	4157	1226	0.489	0.545	0	63
RN	2410900	Riachuelo	7067	1851	0.481	0.561	0	98
RN	2411007	Rodolfo Fernandes	4417	1245	0.519	0.561	0	71
RN	2411056	Tibau	3687	1030	0.53	0.627	0	112
RN	2411106	Ruy Barbosa	3595	969	0.517	0.548	0	56
RN	2411205	Santa Cruz	35759	9961	0.564	0.597	0	1457
RN	2411403	Santana do Matos	13798	4050	0.482	0.559	0	192
RN	2411429	Santana do Seridó	2526	728	0.58	0.595	0	79
RN	2411502	Santo Antônio	22214	6398	0.512	0.595	0	433
RN	2411601	São Bento do Norte	2974	798	0.415	0.541	0	34
RN	2411700	São Bento do Trairí	3909	1028	0.525	0.526	0	79
RN	2411809	São Fernando	3401	1003	0.508	0.591	0	99
RN	2411908	São Francisco do Oeste	3874	1172	0.547	0.581	0	133
RN	2412005	São Gonçalo do Amarante	87700	24506	0.564	0.619	0	3411
RN	2412104	São João do Sabugi	5914	1842	0.581	0.62	0	282
RN	2412203	São José de Mipibu	39771	10882	0.508	0.599	0	863
RN	2412302	São José do Campestre	12359	3451	0.522	0.564	0	272
RN	2412401	São José do Seridó	4231	1249	0.647	0.634	0	194
RN	2412500	São Miguel	22159	6218	0.518	0.574	0	637
RN	2412559	São Miguel do Gostoso	8659	2216	0.468	0.558	0	118
RN	2412609	São Paulo do Potengi	15866	4561	0.555	0.584	0	419
RN	2412708	São Pedro	6223	1729	0.449	0.574	0	108
RN	2412807	São Rafael	8106	2418	0.493	0.588	0	194
RN	2412906	São Tomé	10868	3149	0.461	0.565	0	190
RN	2413003	São Vicente	6030	1813	0.556	0.606	0	217
RN	2413102	Senador Elói de Souza	5645	1551	0.504	0.523	0	68
RN	2413201	Senador Georgino Avelino	3924	1044	0.455	0.543	0	47
RN	2413300	Serra de São Bento	5746	1586	0.482	0.551	0	60
RN	2413359	Serra do Mel	10281	2821	0.521	0.574	0	91
RN	2413409	Serra Negra do Norte	7770	2157	0.468	0.578	0	132
RN	2413508	Serrinha	6581	1789	0.502	0.547	0	54
RN	2413557	Serrinha dos Pintos	4538	1372	0.492	0.555	0	148
RN	2413607	Severiano Melo	5752	1732	0.522	0.579	0	144
RN	2413706	Sítio Novo	5020	1427	0.491	0.528	0	29
RN	2413805	Taboleiro Grande	2317	690	0.507	0.57	0	52
RN	2413904	Taipu	11836	3056	0.435	0.544	0	48
RN	2414001	Tangará	14175	3937	0.516	0.566	0	218
RN	2414100	Tenente Ananias	9911	2663	0.468	0.57	0	300
RN	2414159	Tenente Laurentino Cruz	5406	1544	0.586	0.559	0	107
RN	2414209	Tibau do Sul	11402	3247	0.504	0.672	0	395
RN	2414308	Timbaúba dos Batistas	2295	677	0.591	0.614	0	86
RN	2414407	Touros	31076	7941	0.466	0.562	0	424
RN	2414456	Triunfo Potiguar	3366	925	0.516	0.579	0	55
RN	2414506	Umarizal	10669	3134	0.506	0.59	0	368
RN	2414605	Upanema	12985	3714	0.516	0.542	0	198
RN	2414704	Várzea(*)	8812	2594	0.552	0.577	0	44
RN	2414753	Venha-Ver	3821	932	0.473	0.501	0	33
RN	2414803	Vera Cruz	10725	2789	0.494	0.558	0	104
RN	2414902	Viçosa	1618	481	0.502	0.552	0	40
RN	2415008	Vila Flor	2872	690	0.471	0.561	0	16
PB	2500106	Água Branca	9449	2562	0.484	0.542	0	120
PB	2500205	Aguiar	5530	1660	0.447	0.632	0	76
PB	2500304	Alagoa Grande	28482	8025	0.43	0.576	0	633
PB	2500403	Alagoa Nova	19686	5435	0.451	0.567	0	479
PB	2500502	Alagoinha	13577	3703	0.462	0.574	0	244
PB	2500536	Alcantil	5239	1567	0.458	0.55	0	40
PB	2500577	Algodão de Jandaíra	2366	676	0.413	0.532	0	3
PB	2500601	Alhandra	18001	5089	0.465	0.544	0	238
PB	2500700	São João do Rio do Peixe	18201	5396	0.49	0.586	0	506
PB	2500734	Amparo	2088	636	0.551	0.537	0	31
PB	2500775	Aparecida	7676	2209	0.456	0.567	0	105
PB	2500809	Araçagi	17224	5017	0.412	0.54	0	259
PB	2500908	Arara	12653	3918	0.407	0.569	0	225
PB	2501005	Araruna	18886	5262	0.439	0.549	0	257
PB	2501104	Areia	23837	6381	0.467	0.593	0	757
PB	2501153	Areia de Baraúnas	1927	488	0.462	0.566	0	13
PB	2501203	Areial	6470	1964	0.503	0.573	0	131
PB	2501302	Aroeiras	19089	5434	0.411	0.537	0	246
PB	2501351	Assunção	3522	1046	0.51	0.601	0	49
PB	2501401	Baía da Traição	8007	2108	0.495	0.541	0	143
PB	2501500	Bananeiras	21854	5960	0.43	0.555	0	447
PB	2501534	Baraúna	4222	1300	0.459	0.526	0	74
PB	2501575	Barra de Santana	8205	2431	0.465	0.526	0	20
PB	2501609	Barra de Santa Rosa	14160	4199	0.434	0.542	0	253
PB	2501708	Barra de São Miguel	5611	1635	0.44	0.584	0	30
PB	2501807	Bayeux	99758	28007	0.566	0.619	0	3704
PB	2501906	Belém	17083	5180	0.492	0.557	0	494
PB	2502003	Belém do Brejo do Cruz	7143	1974	0.451	0.55	0	168
PB	2502052	Bernardino Batista	3075	803	0.462	0.526	0	30
PB	2502102	Boa Ventura	5751	1496	0.48	0.566	0	100
PB	2502151	Boa Vista	6224	1737	0.582	0.59	0	237
PB	2502201	Bom Jesus	2399	699	0.477	0.584	0	40
PB	2502300	Bom Sucesso	5037	1517	0.494	0.558	0	99
PB	2502409	Bonito de Santa Fé	10806	2814	0.427	0.564	0	225
PB	2502508	Boqueirão	16889	4868	0.496	0.592	0	425
PB	2502607	Igaracy	6156	1736	0.496	0.575	0	111
PB	2502706	Borborema	5111	1404	0.426	0.544	0	94
PB	2502805	Brejo do Cruz	13123	3632	0.463	0.575	0	306
PB	2502904	Brejo dos Santos	6197	1830	0.541	0.564	0	99
PB	2503001	Caaporã	20363	5477	0.509	0.565	0	264
PB	2503100	Cabaceiras	5035	1515	0.523	0.574	0	134
PB	2503209	Cabedelo	57926	17330	0.651	0.782	0	5051
PB	2503308	Cachoeira dos Índios	9546	2609	0.453	0.583	0	140
PB	2503407	Cacimba de Areia	3557	1033	0.497	0.553	0	53
PB	2503506	Cacimba de Dentro	16755	4626	0.419	0.551	0	250
PB	2503555	Cacimbas	6814	1810	0.425	0.501	0	34
PB	2503605	Caiçara	7220	2105	0.488	0.58	0	147
PB	2503704	Cajazeiras	58437	17505	0.574	0.668	0	3362
PB	2503753	Cajazeirinhas	3033	827	0.413	0.521	0	24
PB	2503803	Caldas Brandão	5637	1707	0.451	0.562	0	106
PB	2503902	Camalaú	5749	1862	0.431	0.549	0	63
PB	2504009	Campina Grande	385276	113080	0.654	0.702	1	35452
PB	2504033	Capim	5601	1461	0.4	0.52	0	51
PB	2504074	Caraúbas	3899	1197	0.485	0.58	0	56
PB	2504108	Carrapateira	2378	593	0.543	0.529	0	34
PB	2504157	Casserengue	7058	1948	0.379	0.492	0	91
PB	2504207	Catingueira	4812	1307	0.455	0.553	0	75
PB	2504306	Catolé do Rocha	28766	8316	0.539	0.617	0	1182
PB	2504355	Caturité	4546	1329	0.502	0.617	0	90
PB	2504405	Conceição	18366	5159	0.476	0.577	0	447
PB	2504504	Condado	6587	1911	0.476	0.573	0	124
PB	2504603	Conde	21418	5848	0.5	0.591	1	405
PB	2504702	Congo	4692	1478	0.477	0.562	0	91
PB	2504801	Coremas	15149	4383	0.452	0.578	0	313
PB	2504850	Coxixola	1771	588	0.567	0.586	0	32
PB	2504900	Cruz do Espírito Santo	16257	4236	0.408	0.531	0	85
PB	2505006	Cubati	6868	2031	0.448	0.545	0	157
PB	2505105	Cuité	19950	5923	0.47	0.574	0	677
PB	2505204	Cuitegi	6889	1909	0.45	0.563	0	100
PB	2505238	Cuité de Mamanguape	6198	1732	0.398	0.529	0	64
PB	2505279	Curral de Cima	5214	1467	0.392	0.528	0	52
PB	2505303	Curral Velho	2505	653	0.491	0.613	0	5
PB	2505352	Damião	4900	1377	0.391	0.503	0	56
PB	2505402	Desterro	7991	2317	0.49	0.551	0	170
PB	2505501	Vista Serrana	3508	923	0.424	0.554	0	58
PB	2505600	Diamante	6616	1764	0.496	0.562	0	105
PB	2505709	Dona Inês	10517	2960	0.447	0.524	0	201
PB	2505808	Duas Estradas	3640	1079	0.488	0.565	0	116
PB	2505907	Emas	3317	831	0.492	0.554	0	44
PB	2506004	Esperança	31095	9186	0.526	0.598	0	827
PB	2506103	Fagundes	11409	3252	0.432	0.543	0	163
PB	2506202	Frei Martinho	2933	966	0.542	0.631	0	65
PB	2506251	Gado Bravo	8376	2234	0.373	0.491	0	36
PB	2506301	Guarabira	55340	16533	0.586	0.641	0	2819
PB	2506400	Gurinhém	13872	3883	0.435	0.544	0	217
PB	2506509	Gurjão	3159	942	0.581	0.576	0	122
PB	2506608	Ibiara	6031	1770	0.479	0.548	0	124
PB	2506707	Imaculada	11352	2910	0.461	0.524	0	138
PB	2506806	Ingá	18180	5261	0.471	0.573	0	348
PB	2506905	Itabaiana	24483	7481	0.536	0.592	0	1042
PB	2507002	Itaporanga	23195	6469	0.517	0.607	0	740
PB	2507101	Itapororoca	16998	4796	0.437	0.543	0	228
PB	2507200	Itatuba	10201	2842	0.436	0.549	0	99
PB	2507309	Jacaraú	13952	4091	0.435	0.554	0	307
PB	2507408	Jericó	7538	2113	0.476	0.577	0	155
PB	2507507	João Pessoa	723514	217211	0.693	0.77	1	81255
PB	2507606	Juarez Távora	7459	2189	0.465	0.544	0	109
PB	2507705	Juazeirinho	16776	4510	0.435	0.557	0	267
PB	2507804	Junco do Seridó	6643	1896	0.576	0.571	0	119
PB	2507903	Juripiranga	10240	2909	0.448	0.544	0	193
PB	2508000	Juru	9826	2718	0.443	0.552	0	213
PB	2508109	Lagoa	4681	1315	0.448	0.533	0	68
PB	2508208	Lagoa de Dentro	7370	2172	0.444	0.539	0	102
PB	2508307	Lagoa Seca	25911	7219	0.516	0.621	0	595
PB	2508406	Lastro	2841	738	0.38	0.532	0	37
PB	2508505	Livramento	7164	2054	0.473	0.523	0	111
PB	2508554	Logradouro	3942	1106	0.47	0.544	0	44
PB	2508604	Lucena	11730	3131	0.469	0.577	0	294
PB	2508703	Mãe d'Água	4019	1185	0.429	0.52	0	38
PB	2508802	Malta	5612	1659	0.533	0.62	0	121
PB	2508901	Mamanguape	42330	11640	0.453	0.585	0	812
PB	2509008	Manaíra	10759	2931	0.426	0.537	0	94
PB	2509057	Marcação	7611	2043	0.408	0.525	0	46
PB	2509107	Mari	21173	6338	0.429	0.553	0	497
PB	2509156	Marizópolis	6173	1754	0.512	0.582	0	155
PB	2509206	Massaranduba	12910	3778	0.441	0.552	0	197
PB	2509305	Mataraca	7404	1970	0.427	0.533	0	48
PB	2509339	Matinhas	4316	1136	0.4	0.531	0	25
PB	2509370	Mato Grosso	2702	720	0.419	0.566	0	45
PB	2509396	Maturéia	5939	1679	0.474	0.54	0	125
PB	2509404	Mogeiro	12490	3618	0.481	0.538	0	174
PB	2509503	Montadas	4990	1452	0.505	0.545	0	34
PB	2509602	Monte Horebe	4508	1311	0.463	0.579	0	53
PB	2509701	Monteiro	30844	9815	0.558	0.625	0	973
PB	2509800	Mulungu	9469	2751	0.423	0.548	0	78
PB	2509909	Natuba	10566	2850	0.432	0.516	0	84
PB	2510006	Nazarezinho	7280	2113	0.449	0.528	0	117
PB	2510105	Nova Floresta	10533	3176	0.498	0.576	0	277
PB	2510204	Nova Olinda	6070	1684	0.453	0.557	0	122
PB	2510303	Nova Palmeira	4365	1313	0.488	0.567	0	71
PB	2510402	Olho d'Água	6931	1871	0.452	0.533	0	83
PB	2510501	Olivedos	3627	1061	0.54	0.531	0	63
PB	2510600	Ouro Velho	2928	942	0.518	0.585	0	45
PB	2510659	Parari	1256	402	0.467	0.583	0	20
PB	2510709	Passagem	2233	674	0.534	0.566	0	38
PB	2510808	Patos	100695	29283	0.628	0.667	0	5012
PB	2510907	Paulista	11783	3316	0.461	0.587	0	221
PB	2511004	Pedra Branca	3721	994	0.532	0.532	0	32
PB	2511103	Pedra Lavrada	7475	2249	0.458	0.564	0	168
PB	2511202	Pedras de Fogo	27034	7410	0.468	0.568	0	550
PB	2511301	Piancó	15465	4637	0.55	0.593	0	587
PB	2511400	Picuí	18226	5451	0.506	0.596	0	546
PB	2511509	Pilar	11191	3178	0.461	0.544	0	196
PB	2511608	Pilões	6978	1733	0.409	0.559	0	147
PB	2511707	Pilõezinhos	5155	1433	0.421	0.532	0	37
PB	2511806	Pirpirituba	10319	2946	0.499	0.566	0	203
PB	2511905	Pitimbu	17032	4737	0.456	0.538	0	141
PB	2512002	Pocinhos	17020	4792	0.477	0.556	0	238
PB	2512036	Poço Dantas	3752	992	0.408	0.506	0	14
PB	2512077	Poço de José de Moura	3978	1188	0.497	0.578	0	76
PB	2512101	Pombal	32117	9340	0.515	0.629	0	1284
PB	2512200	Prata	3854	1162	0.514	0.566	0	112
PB	2512309	Princesa Isabel	21283	6056	0.514	0.6	0	596
PB	2512408	Puxinanã	12929	3679	0.542	0.574	0	224
PB	2512507	Queimadas	41054	12020	0.489	0.578	0	1275
PB	2512606	Quixabá	1699	439	0.579	0.564	0	24
PB	2512705	Remígio	17582	5033	0.474	0.592	0	544
PB	2512721	Pedro Régis	5779	1725	0.399	0.529	0	45
PB	2512747	Riachão	3274	930	0.481	0.515	0	29
PB	2512754	Riachão do Bacamarte	4264	1281	0.417	0.561	0	83
PB	2512762	Riachão do Poço	4164	1172	0.426	0.537	0	14
PB	2512788	Riacho de Santo Antônio	1722	480	0.502	0.569	0	16
PB	2512804	Riacho dos Cavalos	8314	2226	0.447	0.546	0	136
PB	2512903	Rio Tinto	22979	6645	0.48	0.562	0	666
PB	2513000	Salgadinho	3508	958	0.454	0.531	0	25
PB	2513109	Salgado de São Félix	11976	3552	0.448	0.531	0	127
PB	2513158	Santa Cecília	6661	1813	0.402	0.515	0	20
PB	2513208	Santa Cruz	6471	1906	0.523	0.578	0	180
PB	2513307	Santa Helena	5369	1666	0.504	0.57	0	139
PB	2513356	Santa Inês	3539	928	0.492	0.54	0	27
PB	2513406	Santa Luzia	14729	4392	0.635	0.62	0	687
PB	2513505	Santana de Mangueira	5332	1416	0.414	0.488	0	65
PB	2513604	Santana dos Garrotes	7266	2007	0.479	0.568	0	89
PB	2513653	Santarém	2615	753	0.568	0.553	0	39
PB	2513703	Santa Rita	120333	33931	0.534	0.597	0	3787
PB	2513802	Santa Teresinha	4581	1265	0.513	0.586	0	55
PB	2513851	Santo André	2638	798	0.476	0.568	0	16
PB	2513901	São Bento	30880	8480	0.424	0.597	0	979
PB	2513927	São Bentinho	4138	1201	0.491	0.575	0	34
PB	2513943	São Domingos do Cariri	2420	717	0.438	0.603	0	48
PB	2513968	São Domingos	2851	829	0.394	0.555	0	4
PB	2513984	São Francisco	3364	1006	0.481	0.56	0	33
PB	2514008	São João do Cariri	4344	1321	0.488	0.618	0	102
PB	2514107	São João do Tigre	4396	1447	0.424	0.523	0	45
PB	2514206	São José da Lagoa Tapada	7564	2225	0.389	0.53	0	110
PB	2514305	São José de Caiana	6010	1468	0.434	0.545	0	35
PB	2514404	São José de Espinharas	4760	1307	0.448	0.543	0	55
PB	2514453	São José dos Ramos	5508	1530	0.406	0.527	0	40
PB	2514503	São José de Piranhas	19099	5394	0.461	0.594	0	365
PB	2514552	São José de Princesa	4219	1104	0.443	0.533	0	9
PB	2514602	São José do Bonfim	3233	882	0.493	0.549	0	41
PB	2514651	São José do Brejo do Cruz	1684	424	0.473	0.535	0	20
PB	2514701	São José do Sabugi	4010	1138	0.514	0.584	0	78
PB	2514800	São José dos Cordeiros	3985	1262	0.407	0.542	0	48
PB	2514909	São Mamede	7748	2351	0.558	0.617	0	171
PB	2515005	São Miguel de Taipu	6696	1780	0.443	0.516	0	45
PB	2515104	São Sebastião de Lagoa de Roça	11041	3135	0.471	0.561	0	326
PB	2515203	São Sebastião do Umbuzeiro	3239	1046	0.459	0.561	0	80
PB	2515302	Sapé	50151	14103	0.461	0.563	0	1154
PB	2515401	Seridó	10230	2629	0.453	0.528	0	97
PB	2515500	Serra Branca	12971	4137	0.537	0.598	0	349
PB	2515609	Serra da Raiz	3204	898	0.544	0.57	0	56
PB	2515708	Serra Grande	2975	861	0.491	0.549	0	36
PB	2515807	Serra Redonda	7054	2197	0.424	0.565	0	112
PB	2515906	Serraria	6238	1729	0.392	0.536	0	61
PB	2515930	Sertãozinho	4395	1287	0.561	0.554	0	102
PB	2515971	Sobrado	7363	2039	0.477	0.525	0	39
PB	2516003	Solânea	26689	7747	0.468	0.592	1	877
PB	2516102	Soledade	13739	3957	0.506	0.598	0	513
PB	2516151	Sossêgo	3173	920	0.46	0.531	0	57
PB	2516201	Sousa	65807	19039	0.567	0.645	0	3007
PB	2516300	Sumé	16072	5361	0.534	0.602	0	505
PB	2516409	Campo de Santana	10263	2588	0.45	0.513	0	75
PB	2516508	Taperoá	14938	4264	0.456	0.564	0	360
PB	2516607	Tavares	14103	3803	0.462	0.56	0	191
PB	2516706	Teixeira	14153	4050	0.527	0.566	0	394
PB	2516755	Tenório	2816	764	0.49	0.565	0	35
PB	2516805	Triunfo	9223	2563	0.501	0.578	0	125
PB	2516904	Uiraúna	14584	4294	0.528	0.612	0	554
PB	2517001	Umbuzeiro	9300	2618	0.514	0.545	0	179
PB	2517100	Várzea	2504	796	0.714	0.619	0	100
PB	2517209	Vieirópolis	5045	1420	0.455	0.537	0	64
PB	2517407	Zabelê	2075	673	0.587	0.567	0	26
PE	2600054	Abreu e Lima	94428	28613	0.632	0.625	0	5695
PE	2600104	Afogados da Ingazeira	35091	10918	0.565	0.623	0	1483
PE	2600203	Afrânio	17588	4744	0.493	0.542	0	232
PE	2600302	Agrestina	22680	6882	0.47	0.581	0	496
PE	2600401	Água Preta	33046	7930	0.432	0.514	0	241
PE	2600500	Águas Belas	40007	10886	0.385	0.546	0	495
PE	2600609	Alagoinha	13761	4108	0.472	0.569	0	288
PE	2600708	Aliança	37414	10299	0.488	0.565	1	700
PE	2600807	Altinho	22363	7065	0.482	0.559	0	409
PE	2600906	Amaraji	21925	6198	0.454	0.575	0	244
PE	2601003	Angelim	10204	3002	0.448	0.555	0	233
PE	2601052	Araçoiaba	18144	4851	0.498	0.544	0	205
PE	2601102	Araripina	77363	20667	0.467	0.595	0	1603
PE	2601201	Arcoverde	69157	20752	0.567	0.654	0	3795
PE	2601300	Barra de Guabiraba	12765	3358	0.474	0.558	0	150
PE	2601409	Barreiros	40720	10809	0.491	0.561	0	939
PE	2601508	Belém de Maria	11349	3077	0.479	0.537	0	155
PE	2601607	Belém de São Francisco	20236	5056	0.553	0.611	0	454
PE	2601706	Belo Jardim	72412	22319	0.514	0.617	0	2781
PE	2601805	Betânia	12005	3318	0.441	0.533	0	107
PE	2601904	Bezerros	58675	19325	0.487	0.608	0	2609
PE	2602001	Bodocó	35178	8956	0.445	0.543	0	431
PE	2602100	Bom Conselho	45506	12750	0.433	0.585	0	782
PE	2602209	Bom Jardim	37828	10933	0.515	0.552	1	626
PE	2602308	Bonito	37570	10851	0.42	0.559	0	628
PE	2602407	Brejão	8851	2439	0.417	0.54	0	75
PE	2602506	Brejinho	7307	2135	0.493	0.563	0	135
PE	2602605	Brejo da Madre de Deus	45192	13290	0.417	0.581	0	794
PE	2602704	Buenos Aires	12537	3573	0.481	0.556	0	106
PE	2602803	Buíque	51990	13324	0.395	0.497	0	511
PE	2602902	Cabo de Santo Agostinho	185123	53825	0.609	0.654	0	10594
PE	2603009	Cabrobó	30883	8226	0.539	0.581	0	454
PE	2603108	Cachoeirinha	18833	5879	0.439	0.587	0	427
PE	2603207	Caetés	26577	7004	0.392	0.497	0	138
PE	2603306	Calçado	11125	3134	0.468	0.529	0	120
PE	2603405	Calumbi	5651	1656	0.46	0.567	0	104
PE	2603454	Camaragibe	144506	42934	0.628	0.656	0	8556
PE	2603504	Camocim de São Félix	17104	5268	0.472	0.585	0	439
PE	2603603	Camutanga	8147	2264	0.514	0.57	0	229
PE	2603702	Canhotinho	24536	7407	0.403	0.543	0	364
PE	2603801	Capoeiras	19593	5159	0.419	0.529	0	171
PE	2603900	Carnaíba	18585	5388	0.505	0.54	0	330
PE	2603926	Carnaubeira da Penha	11782	2620	0.508	0.491	0	85
PE	2604007	Carpina	74851	21540	0.619	0.63	0	3527
PE	2604106	Caruaru	314951	97208	0.569	0.681	0	22347
PE	2604155	Casinhas	13791	3642	0.489	0.518	0	78
PE	2604205	Catende	37830	10173	0.515	0.578	0	762
PE	2604304	Cedro	10778	2758	0.573	0.565	0	158
PE	2604403	Chã de Alegria	12375	3470	0.529	0.546	0	284
PE	2604502	Chã Grande	20020	5927	0.443	0.603	0	342
PE	2604601	Condado	24298	6838	0.527	0.581	0	725
PE	2604700	Correntes	17421	4397	0.385	0.551	0	219
PE	2604809	Cortês	12458	3358	0.478	0.541	0	270
PE	2604908	Cumaru	17166	5097	0.47	0.553	0	225
PE	2605004	Cupira	23392	7238	0.453	0.601	0	813
PE	2605103	Custódia	34305	10147	0.489	0.607	1	915
PE	2605152	Dormentes	16915	4655	0.495	0.558	0	220
PE	2605202	Escada	63535	18220	0.543	0.594	0	1691
PE	2605301	Exu	31636	8191	0.454	0.543	0	423
PE	2605400	Feira Nova	20588	6240	0.46	0.581	0	385
PE	2605459	Fernando de Noronha	2629	815	0.748	0.781	0	245
PE	2605509	Ferreiros	11437	3117	0.519	0.589	0	205
PE	2605608	Flores	22171	6750	0.423	0.544	0	317
PE	2605707	Floresta	29284	7234	0.538	0.588	1	673
PE	2605806	Frei Miguelinho	14231	4494	0.438	0.575	0	169
PE	2605905	Gameleira	27915	6980	0.532	0.541	0	295
PE	2606002	Garanhuns	129392	37628	0.556	0.662	0	8243
PE	2606101	Glória do Goitá	29675	8274	0.506	0.57	0	420
PE	2606200	Goiana	75648	21565	0.576	0.614	0	3333
PE	2606309	Granito	6857	1797	0.502	0.543	0	111
PE	2606408	Gravatá	76669	23545	0.51	0.63	0	3178
PE	2606507	Iati	18271	4799	0.369	0.518	0	242
PE	2606606	Ibimirim	26959	7035	0.446	0.533	0	251
PE	2606705	Ibirajuba	7534	2302	0.476	0.545	0	91
PE	2606804	Igarassu	101987	29838	0.606	0.622	0	3685
PE	2606903	Iguaraci	11780	3624	0.48	0.58	0	177
PE	2607000	Inajá	19081	4168	0.4	0.503	0	139
PE	2607109	Ingazeira	4496	1302	0.51	0.575	0	95
PE	2607208	Ipojuca	80542	22177	0.499	0.613	0	2595
PE	2607307	Ipubi	28120	7251	0.433	0.541	0	278
PE	2607406	Itacuruba	4369	1143	0.523	0.567	0	122
PE	2607505	Itaíba	26264	7026	0.364	0.531	0	216
PE	2607604	Ilha de Itamaracá	22449	9081	0.548	0.627	0	588
PE	2607653	Itambé	35398	9466	0.463	0.566	0	702
PE	2607703	Itapetim	13882	4493	0.494	0.598	0	406
PE	2607752	Itapissuma	23723	7401	0.564	0.589	0	502
PE	2607802	Itaquitinga	15698	4319	0.509	0.554	0	275
PE	2607901	Jaboatão dos Guararapes	644699	197799	0.642	0.692	0	54785
PE	2607950	Jaqueira	11513	2941	0.454	0.557	0	185
PE	2608008	Jataúba	15810	4654	0.381	0.549	0	138
PE	2608057	Jatobá	13982	3844	0.573	0.604	0	523
PE	2608107	João Alfredo	30735	9282	0.466	0.569	1	477
PE	2608206	Joaquim Nabuco	15774	4179	0.449	0.561	0	355
PE	2608255	Jucati	10604	2997	0.451	0.541	0	68
PE	2608305	Jupi	13709	3976	0.487	0.56	0	316
PE	2608404	Jurema	14494	4178	0.372	0.522	0	150
PE	2608453	Lagoa do Carro	15990	4639	0.505	0.566	0	259
PE	2608503	Lagoa do Itaenga	20653	5834	0.509	0.555	0	380
PE	2608602	Lagoa do Ouro	12121	3418	0.369	0.536	0	87
PE	2608701	Lagoa dos Gatos	15615	4683	0.416	0.555	0	207
PE	2608750	Lagoa Grande	22719	6083	0.52	0.581	0	317
PE	2608800	Lajedo	36606	11056	0.503	0.599	0	1005
PE	2608909	Limoeiro	55574	17647	0.583	0.628	0	2228
PE	2609006	Macaparana	23907	6700	0.508	0.571	0	479
PE	2609105	Machados	13632	3597	0.466	0.541	0	245
PE	2609154	Manari	18187	4147	0.354	0.477	0	53
PE	2609204	Maraial	12257	3149	0.403	0.541	0	123
PE	2609303	Mirandiba	14308	3614	0.525	0.512	0	152
PE	2609402	Moreno	56767	16503	0.564	0.61	0	2066
PE	2609501	Nazaré da Mata	30782	8763	0.604	0.608	0	1056
PE	2609600	Olinda	375559	113669	0.675	0.704	0	32931
PE	2609709	Orobó	22865	6354	0.528	0.545	0	395
PE	2609808	Orocó	13176	3407	0.553	0.536	0	81
PE	2609907	Ouricuri	64335	16601	0.419	0.578	0	1235
PE	2610004	Palmares	59524	15956	0.55	0.588	0	1989
PE	2610103	Palmeirina	8188	2334	0.438	0.554	0	84
PE	2610202	Panelas	25654	7298	0.433	0.546	0	412
PE	2610301	Paranatama	11001	3133	0.418	0.528	0	148
PE	2610400	Parnamirim	20227	5091	0.499	0.556	1	252
PE	2610509	Passira	28664	8641	0.487	0.559	0	435
PE	2610608	Paudalho	51374	14233	0.545	0.612	0	1487
PE	2610707	Paulista	300611	90939	0.703	0.673	0	25822
PE	2610806	Pedra	20950	5921	0.445	0.55	0	312
PE	2610905	Pesqueira	62793	18996	0.506	0.597	0	2066
PE	2611002	Petrolândia	32485	8626	0.531	0.604	0	775
PE	2611101	Petrolina	294081	81378	0.611	0.695	0	18621
PE	2611200	Poção	11242	3378	0.402	0.542	0	194
PE	2611309	Pombos	24033	7251	0.463	0.584	0	538
PE	2611408	Primavera	13439	3746	0.444	0.572	0	205
PE	2611507	Quipapá	24187	6337	0.427	0.53	0	320
PE	2611533	Quixaba	6735	1804	0.482	0.53	0	76
PE	2611606	Recife	1536934	477166	0.698	0.798	0	181967
PE	2611705	Riacho das Almas	19158	6026	0.418	0.586	0	371
PE	2611804	Ribeirão	44445	12000	0.516	0.595	0	1013
PE	2611903	Rio Formoso	22140	5485	0.506	0.562	0	254
PE	2612000	Sairé	11242	3573	0.44	0.581	0	252
PE	2612109	Salgadinho	9287	2294	0.405	0.516	0	36
PE	2612208	Salgueiro	56641	15513	0.58	0.645	0	2896
PE	2612307	Saloá	15283	4526	0.421	0.559	0	215
PE	2612406	Sanharó	21960	5988	0.514	0.564	0	410
PE	2612455	Santa Cruz	13594	3609	0.438	0.522	0	90
PE	2612471	Santa Cruz da Baixa Verde	11769	3352	0.523	0.557	0	182
PE	2612505	Santa Cruz do Capibaribe	87538	26074	0.506	0.667	0	4342
PE	2612554	Santa Filomena	13322	3611	0.406	0.496	0	112
PE	2612604	Santa Maria da Boa Vista	39473	9813	0.472	0.564	0	602
PE	2612703	Santa Maria do Cambucá	13023	3812	0.393	0.571	0	70
PE	2612802	Santa Terezinha	10991	3021	0.524	0.54	0	271
PE	2612901	São Benedito do Sul	13939	3193	0.406	0.499	0	57
PE	2613008	São Bento do Una	53232	14699	0.446	0.593	0	748
PE	2613107	São Caitano	35278	10729	0.469	0.583	1	821
PE	2613206	São João	21305	5815	0.426	0.565	0	294
PE	2613305	São Joaquim do Monte	20489	6231	0.381	0.549	0	402
PE	2613404	São José da Coroa Grande	18172	4919	0.522	0.585	0	457
PE	2613503	São José do Belmonte	32620	8825	0.52	0.569	0	632
PE	2613602	São José do Egito	31838	10103	0.554	0.602	0	1017
PE	2613701	São Lourenço da Mata	102956	30374	0.571	0.614	0	4209
PE	2613800	São Vicente Ferrer	17000	4649	0.414	0.558	0	365
PE	2613909	Serra Talhada	79241	23088	0.571	0.632	0	3490
PE	2614006	Serrita	18331	4418	0.512	0.542	0	111
PE	2614105	Sertânia	33723	9755	0.51	0.601	0	899
PE	2614204	Sirinhaém	40306	10247	0.492	0.568	0	713
PE	2614303	Moreilândia	11137	2984	0.54	0.522	0	136
PE	2614402	Solidão	5744	1547	0.485	0.547	0	54
PE	2614501	Surubim	58444	17564	0.548	0.617	0	2271
PE	2614600	Tabira	26430	7991	0.504	0.57	0	942
PE	2614709	Tacaimbó	12704	3914	0.423	0.536	0	111
PE	2614808	Tacaratu	22073	5738	0.507	0.521	0	82
PE	2614857	Tamandaré	20745	5363	0.479	0.583	0	423
PE	2615003	Taquaritinga do Norte	24923	7438	0.52	0.636	1	698
PE	2615102	Terezinha	6737	1846	0.425	0.536	0	87
PE	2615201	Terra Nova	9256	2428	0.533	0.545	0	86
PE	2615300	Timbaúba	53823	15257	0.519	0.592	0	1908
PE	2615409	Toritama	35631	10208	0.452	0.655	0	1148
PE	2615508	Tracunhaém	13055	3649	0.504	0.567	0	152
PE	2615607	Trindade	26116	6909	0.455	0.602	0	559
PE	2615706	Triunfo	15006	4371	0.591	0.624	0	500
PE	2615805	Tupanatinga	24254	6166	0.379	0.494	0	184
PE	2615904	Tuparetama	7925	2609	0.557	0.612	0	288
PE	2616001	Venturosa	16064	4528	0.484	0.57	0	305
PE	2616100	Verdejante	9142	2439	0.52	0.56	0	139
PE	2616183	Vertente do Lério	7894	2310	0.461	0.532	0	60
PE	2616209	Vertentes	18267	5499	0.45	0.602	0	302
PE	2616308	Vicência	30731	8096	0.534	0.551	0	689
PE	2616407	Vitória de Santo Antão	130540	40001	0.543	0.629	0	6586
PE	2616506	Xexéu	14092	3683	0.436	0.549	0	269
AL	2700102	Água Branca	19376	4743	0.432	0.527	0	199
AL	2700201	Anadia	17423	4670	0.444	0.546	0	226
AL	2700300	Arapiraca	214067	58667	0.549	0.638	0	9556
AL	2700409	Atalaia	44379	11108	0.431	0.545	0	712
AL	2700508	Barra de Santo Antônio	14228	3523	0.428	0.552	0	237
AL	2700607	Barra de São Miguel	7573	2032	0.475	0.638	0	311
AL	2700706	Batalha	17076	4415	0.496	0.563	0	416
AL	2700805	Belém	4551	1308	0.464	0.587	0	55
AL	2700904	Belo Monte	7032	1814	0.376	0.507	0	64
AL	2701001	Boca da Mata	25780	6626	0.518	0.56	0	822
AL	2701100	Branquinha	10586	2650	0.362	0.534	0	79
AL	2701209	Cacimbinhas	10197	2897	0.384	0.559	0	160
AL	2701308	Cajueiro	20410	4917	0.473	0.542	0	236
AL	2701357	Campestre	6599	1692	0.435	0.55	0	86
AL	2701407	Campo Alegre	50831	10960	0.47	0.531	0	834
AL	2701506	Campo Grande	9032	2368	0.387	0.502	0	65
AL	2701605	Canapi	17248	4484	0.357	0.504	0	176
AL	2701704	Capela	17077	4250	0.456	0.554	0	406
AL	2701803	Carneiros	8290	2081	0.398	0.517	0	67
AL	2701902	Chã Preta	7146	1877	0.481	0.537	0	87
AL	2702009	Coité do Nóia	10926	2989	0.398	0.52	0	100
AL	2702108	Colônia Leopoldina	20022	5283	0.363	0.548	0	353
AL	2702207	Coqueiro Seco	5523	1522	0.457	0.582	0	136
AL	2702306	Coruripe(*)	64195	16503	0.541	0.591	0	1108
AL	2702355	Craíbas	22643	5948	0.408	0.517	0	167
AL	2702405	Delmiro Gouveia	48090	13265	0.494	0.599	0	1548
AL	2702504	Dois Riachos	10879	2950	0.385	0.513	0	118
AL	2702553	Estrela de Alagoas	17254	5007	0.41	0.515	0	127
AL	2702603	Feira Grande	21325	5725	0.402	0.512	0	203
AL	2702702	Feliz Deserto	4332	1206	0.462	0.55	0	51
AL	2702801	Flexeiras	12339	3196	0.4	0.528	0	202
AL	2702900	Girau do Ponciano	36625	9119	0.405	0.498	0	326
AL	2703007	Ibateguara	15133	4144	0.393	0.517	0	256
AL	2703106	Igaci	25197	7118	0.424	0.547	0	298
AL	2703205	Igreja Nova	23298	6287	0.428	0.556	0	189
AL	2703304	Inhapi	17902	4422	0.316	0.501	0	259
AL	2703403	Jacaré dos Homens	5413	1399	0.481	0.543	0	83
AL	2703502	Jacuípe	6986	1700	0.41	0.532	0	96
AL	2703601	Japaratinga	7752	2038	0.451	0.56	0	92
AL	2703700	Jaramataia	5562	1414	0.451	0.532	0	75
AL	2703809	Joaquim Gomes	22581	5619	0.386	0.509	0	125
AL	2703908	Jundiá	4202	1132	0.434	0.573	0	91
AL	2704005	Junqueiro	23854	6382	0.454	0.586	0	426
AL	2704104	Lagoa da Canoa	18253	4817	0.443	0.541	0	252
AL	2704203	Limoeiro de Anadia	26992	6822	0.457	0.575	0	274
AL	2704302	Maceió	932608	276705	0.635	0.739	1	83470
AL	2704401	Major Isidoro	18901	5152	0.424	0.566	0	392
AL	2704500	Maragogi	28746	7405	0.443	0.556	0	500
AL	2704609	Maravilha	10276	2687	0.46	0.539	0	150
AL	2704708	Marechal Deodoro	45994	12342	0.52	0.641	0	1429
AL	2704807	Maribondo	13614	3828	0.487	0.581	0	304
AL	2704906	Mar Vermelho	3652	1045	0.465	0.54	0	47
AL	2705002	Mata Grande	24702	6269	0.369	0.506	0	210
AL	2705101	Matriz de Camaragibe	23780	5927	0.473	0.541	0	352
AL	2705200	Messias	15682	3944	0.46	0.557	0	356
AL	2705309	Minador do Negrão	5280	1471	0.43	0.541	0	70
AL	2705408	Monteirópolis	6944	1698	0.443	0.497	0	49
AL	2705507	Murici	26706	6587	0.395	0.542	0	636
AL	2705606	Novo Lino	12069	3232	0.375	0.546	0	98
AL	2705705	Olho d'Água das Flores	20367	5510	0.422	0.568	0	408
AL	2705804	Olho d'Água do Casado	8491	2148	0.35	0.527	0	78
AL	2705903	Olho d'Água Grande	4957	1303	0.399	0.473	0	45
AL	2706000	Olivença	11057	2917	0.345	0.513	0	142
AL	2706109	Ouro Branco	10911	2973	0.434	0.538	0	106
AL	2706208	Palestina	5112	1277	0.467	0.505	0	45
AL	2706307	Palmeira dos Índios	70434	20577	0.523	0.625	0	2658
AL	2706406	Pão de Açúcar	23809	6091	0.491	0.536	0	574
AL	2706422	Pariconha	10246	2603	0.416	0.526	0	102
AL	2706448	Paripueira	11349	2854	0.486	0.595	0	241
AL	2706505	Passo de Camaragibe	14772	3745	0.421	0.513	0	111
AL	2706604	Paulo Jacinto	7426	2121	0.507	0.551	0	136
AL	2706703	Penedo	60389	16466	0.536	0.602	0	1858
AL	2706802	Piaçabuçu	17219	4665	0.479	0.538	0	382
AL	2706901	Pilar	33312	8847	0.509	0.578	1	788
AL	2707008	Pindoba	2866	762	0.465	0.579	0	32
AL	2707107	Piranhas	23052	5806	0.462	0.563	0	538
AL	2707206	Poço das Trincheiras	13873	3359	0.419	0.484	0	101
AL	2707305	Porto Calvo	25718	6513	0.498	0.558	0	393
AL	2707404	Porto de Pedras	8419	2257	0.379	0.542	0	94
AL	2707503	Porto Real do Colégio	19314	5109	0.431	0.513	0	219
AL	2707602	Quebrangulo	11486	3027	0.421	0.536	0	142
AL	2707701	Rio Largo	68512	18698	0.547	0.616	0	2929
AL	2707800	Roteiro	6656	1661	0.365	0.524	0	22
AL	2707909	Santa Luzia do Norte	6893	1880	0.477	0.58	0	170
AL	2708006	Santana do Ipanema	44949	12034	0.463	0.579	0	1391
AL	2708105	Santana do Mundaú	10961	2840	0.362	0.513	0	96
AL	2708204	São Brás	6720	1835	0.48	0.533	0	104
AL	2708303	São José da Laje	22689	5964	0.434	0.574	0	631
AL	2708402	São José da Tapera	30140	7151	0.409	0.508	0	328
AL	2708501	São Luís do Quitunde	32416	7749	0.4	0.55	1	445
AL	2708600	São Miguel dos Campos	54591	14246	0.514	0.612	0	2255
AL	2708709	São Miguel dos Milagres	7170	2009	0.504	0.545	0	144
AL	2708808	São Sebastião	32007	8509	0.432	0.537	1	388
AL	2708907	Satuba	14604	3823	0.585	0.619	0	692
AL	2708956	Senador Rui Palmeira	13047	3056	0.398	0.481	0	84
AL	2709004	Tanque d'Arca	6122	1763	0.43	0.531	0	37
AL	2709103	Taquarana	19020	5364	0.421	0.529	0	189
AL	2709152	Teotônio Vilela	41158	10365	0.466	0.549	0	725
AL	2709202	Traipu	25710	6382	0.395	0.499	0	261
AL	2709301	União dos Palmares	62401	16683	0.462	0.59	0	2077
AL	2709400	Viçosa	25444	6778	0.478	0.554	0	598
SE	2800100	Amparo de São Francisco	2275	686	0.55	0.569	0	48
SE	2800209	Aquidabã	20066	6013	0.452	0.573	0	368
SE	2800308	Aracaju	570937	170514	0.708	0.784	1	68338
SE	2800407	Arauá	9699	2970	0.49	0.55	0	163
SE	2800506	Areia Branca	16882	5012	0.434	0.579	0	265
SE	2800605	Barra dos Coqueiros	25012	6872	0.545	0.647	0	1027
SE	2800670	Boquim	25528	7252	0.492	0.581	1	871
SE	2800704	Brejo Grande	7745	2041	0.435	0.515	0	59
SE	2801009	Campo do Brito	16766	5194	0.484	0.625	0	518
SE	2801108	Canhoba	3947	1047	0.462	0.553	0	46
SE	2801207	Canindé de São Francisco	24693	6399	0.435	0.566	0	576
SE	2801306	Capela	30769	8463	0.51	0.596	1	562
SE	2801405	Carira	19990	5962	0.442	0.581	0	406
SE	2801504	Carmópolis	13500	3804	0.546	0.623	1	471
SE	2801603	Cedro de São João	5633	1698	0.543	0.608	0	195
SE	2801702	Cristinápolis	16519	4307	0.414	0.54	0	252
SE	2801900	Cumbe	3813	1171	0.512	0.576	0	65
SE	2802007	Divina Pastora	4326	1205	0.527	0.571	0	73
SE	2802106	Estância	64464	18330	0.552	0.627	0	2597
SE	2802205	Feira Nova	5325	1492	0.473	0.546	0	67
SE	2802304	Frei Paulo	13854	3980	0.428	0.623	0	289
SE	2802403	Gararu	11458	3240	0.422	0.544	0	179
SE	2802502	General Maynard	2914	882	0.567	0.609	0	54
SE	2802601	Gracho Cardoso	5648	1704	0.468	0.562	0	67
SE	2802700	Ilha das Flores	8348	2194	0.469	0.514	0	97
SE	2802809	Indiaroba	15861	3976	0.475	0.533	0	256
SE	2802908	Itabaiana	86981	26177	0.513	0.645	0	4260
SE	2803005	Itabaianinha	38886	10456	0.407	0.555	0	740
SE	2803104	Itabi	4972	1583	0.512	0.569	0	128
SE	2803203	Itaporanga d'Ajuda	30428	8338	0.414	0.548	0	567
SE	2803302	Japaratuba	16874	4854	0.544	0.581	0	281
SE	2803401	Japoatã	12947	3640	0.455	0.551	0	126
SE	2803500	Lagarto	94852	27766	0.515	0.613	0	3970
SE	2803609	Laranjeiras	26903	6918	0.582	0.589	1	697
SE	2803708	Macambira	6411	1944	0.474	0.573	0	84
SE	2803807	Malhada dos Bois	3461	936	0.531	0.56	0	78
SE	2803906	Malhador	12056	3561	0.442	0.587	0	226
SE	2804003	Maruim	16338	4447	0.511	0.59	0	408
SE	2804102	Moita Bonita	11034	3485	0.429	0.596	0	281
SE	2804201	Monte Alegre de Sergipe	13621	3643	0.431	0.539	0	282
SE	2804300	Muribeca	7342	2081	0.554	0.575	0	133
SE	2804409	Neópolis	18511	5122	0.505	0.575	0	401
SE	2804458	Nossa Senhora Aparecida	8510	2597	0.43	0.577	0	146
SE	2804508	Nossa Senhora da Glória	32514	9497	0.456	0.591	0	946
SE	2804607	Nossa Senhora das Dores	24579	7296	0.497	0.579	0	579
SE	2804706	Nossa Senhora de Lourdes	6242	1771	0.532	0.56	0	118
SE	2804805	Nossa Senhora do Socorro	160829	45522	0.581	0.62	0	5950
SE	2804904	Pacatuba	13137	3535	0.454	0.514	0	59
SE	2805000	Pedra Mole	2968	873	0.499	0.599	0	57
SE	2805109	Pedrinhas	8821	2405	0.486	0.568	0	249
SE	2805208	Pinhão	5973	1759	0.48	0.58	0	127
SE	2805307	Pirambu	8369	2228	0.515	0.558	0	94
SE	2805406	Poço Redondo	30877	7860	0.376	0.519	0	241
SE	2805505	Poço Verde	21968	6584	0.417	0.563	0	449
SE	2805604	Porto da Folha	27124	7430	0.462	0.537	0	527
SE	2805703	Propriá	28457	8144	0.593	0.629	0	1624
SE	2805802	Riachão do Dantas	19394	5044	0.381	0.527	0	108
SE	2805901	Riachuelo	9351	2473	0.52	0.591	0	196
SE	2806008	Ribeirópolis	17163	5428	0.49	0.61	0	546
SE	2806107	Rosário do Catete	9222	2625	0.571	0.603	0	255
SE	2806206	Salgado	19362	5527	0.486	0.588	0	325
SE	2806305	Santa Luzia do Itanhy	13914	3316	0.414	0.513	0	68
SE	2806404	Santana do São Francisco	7038	1862	0.526	0.544	0	127
SE	2806503	Santa Rosa de Lima	3752	1039	0.514	0.527	0	39
SE	2806602	Santo Amaro das Brotas	11389	3194	0.543	0.613	0	359
SE	2806701	São Cristóvão	78876	22628	0.581	0.624	0	3458
SE	2806800	São Domingos	10257	3118	0.471	0.572	0	220
SE	2806909	São Francisco	3395	1025	0.49	0.564	0	85
SE	2807006	São Miguel do Aleixo	3702	1061	0.424	0.571	0	34
SE	2807105	Simão Dias	38724	11482	0.492	0.579	0	1180
SE	2807204	Siriri	8006	2284	0.541	0.565	0	156
SE	2807303	Telha	2957	839	0.542	0.564	0	69
SE	2807402	Tobias Barreto	48039	14225	0.404	0.609	0	1225
SE	2807501	Tomar do Geru	12873	3562	0.432	0.52	0	235
SE	2807600	Umbaúba	22660	6177	0.476	0.567	0	550
BA	2900108	Abaíra	8324	2583	0.51	0.577	0	191
BA	2900207	Abaré	17072	4335	0.46	0.533	0	156
BA	2900306	Acajutiba	14830	4134	0.487	0.56	0	251
BA	2900355	Adustina	15706	4544	0.432	0.526	0	356
BA	2900405	Água Fria	15726	4610	0.422	0.529	0	216
BA	2900504	Érico Cardoso	10855	2661	0.471	0.558	0	91
BA	2900603	Aiquara	4602	1376	0.471	0.573	0	106
BA	2900702	Alagoinhas	142160	41858	0.592	0.681	0	10683
BA	2900801	Alcobaça	21319	6068	0.476	0.611	0	506
BA	2900900	Almadina	6360	1983	0.421	0.563	0	52
BA	2901007	Amargosa	34340	10462	0.492	0.616	0	1199
BA	2901106	Amélia Rodrigues	25190	7189	0.6	0.609	0	762
BA	2901155	América Dourada	15952	4343	0.464	0.506	0	111
BA	2901205	Anagé	25500	7252	0.371	0.549	0	243
BA	2901304	Andaraí	13948	3783	0.415	0.54	0	230
BA	2901353	Andorinha	14417	4632	0.474	0.586	0	276
BA	2901403	Angical	14073	3804	0.556	0.564	0	201
BA	2901502	Anguera	10248	2534	0.471	0.565	0	41
BA	2901601	Antas	17078	4646	0.491	0.573	0	241
BA	2901700	Antônio Cardoso	11548	2898	0.422	0.544	0	83
BA	2901809	Antônio Gonçalves	11019	3092	0.498	0.58	0	245
BA	2901908	Aporá	17720	5194	0.425	0.516	0	258
BA	2901957	Apuarema	7463	2141	0.413	0.555	0	97
BA	2902005	Aracatu	13732	3657	0.439	0.591	0	211
BA	2902054	Araças	11569	3161	0.462	0.54	0	151
BA	2902104	Araci	51636	13666	0.381	0.534	0	1028
BA	2902203	Aramari	10039	2696	0.47	0.568	0	241
BA	2902252	Arataca	10403	3052	0.413	0.557	0	173
BA	2902302	Aratuípe	8590	2430	0.443	0.57	0	136
BA	2902401	Aurelino Leal	13599	3931	0.434	0.555	0	293
BA	2902500	Baianópolis	13863	3835	0.492	0.543	0	116
BA	2902609	Baixa Grande	20069	5752	0.471	0.549	0	395
BA	2902658	Banzaê	11811	3041	0.468	0.539	0	109
BA	2902708	Barra	49342	11525	0.457	0.503	0	641
BA	2902807	Barra da Estiva	21190	5645	0.469	0.566	0	543
BA	2902906	Barra do Choça	34788	9229	0.386	0.563	0	564
BA	2903003	Barra do Mendes	13997	4125	0.553	0.578	0	175
BA	2903102	Barra do Rocha	6336	1819	0.465	0.585	0	112
BA	2903201	Barreiras(*)	197607	56896	0.668	0.695	0	11256
BA	2903235	Barro Alto	13626	3992	0.55	0.551	0	173
BA	2903300	Barro Preto	6453	1957	0.508	0.576	0	177
BA	2903409	Belmonte	21838	6459	0.48	0.577	0	264
BA	2903508	Belo Campo	16026	4395	0.444	0.562	0	451
BA	2903607	Biritinga	14833	4139	0.402	0.525	0	186
BA	2903706	Boa Nova	15409	4241	0.453	0.535	0	244
BA	2903805	Boa Vista do Tupim	18000	4989	0.447	0.514	0	156
BA	2903904	Bom Jesus da Lapa	63508	16663	0.533	0.615	0	1800
BA	2903953	Bom Jesus da Serra	10123	2626	0.407	0.535	0	45
BA	2904001	Boninal	13695	3399	0.514	0.564	0	109
BA	2904050	Bonito	14851	3966	0.467	0.552	0	213
BA	2904100	Boquira	22042	5804	0.497	0.564	0	425
BA	2904209	Botuporã	11162	2947	0.464	0.543	0	176
BA	2904308	Brejões	14282	3970	0.49	0.56	0	303
BA	2904407	Brejolândia	11127	3147	0.523	0.533	0	41
BA	2904506	Brotas de Macaúbas	10718	3211	0.445	0.552	0	42
BA	2904605	Brumado	64550	18575	0.554	0.63	0	3441
BA	2904704	Buerarema	18622	5511	0.495	0.604	0	603
BA	2904753	Buritirama	19589	4597	0.471	0.504	0	92
BA	2904803	Caatiba	11448	2943	0.406	0.579	0	196
BA	2904852	Cabaceiras do Paraguaçu	17327	4326	0.49	0.525	0	157
BA	2904902	Cachoeira	32035	9894	0.577	0.615	0	1116
BA	2905008	Caculé	22231	6339	0.541	0.621	0	1048
BA	2905107	Caém	10376	2974	0.434	0.535	0	204
BA	2905156	Caetanos	13666	3223	0.409	0.536	0	123
BA	2905206	Caetité	47524	12914	0.484	0.631	0	1602
BA	2905305	Cafarnaum	17212	4757	0.49	0.554	0	214
BA	2905404	Cairu	15366	4866	0.51	0.6	0	401
BA	2905503	Caldeirão Grande	12485	3534	0.473	0.526	0	214
BA	2905602	Camacan	31468	9109	0.419	0.608	0	1040
BA	2905701	Camaçari	242984	74265	0.616	0.681	1	19253
BA	2905800	Camamu	35160	9475	0.452	0.562	0	588
BA	2905909	Campo Alegre de Lourdes	28091	7630	0.43	0.516	0	215
BA	2906006	Campo Formoso	66638	18104	0.475	0.566	0	1667
BA	2906105	Canápolis	9382	2558	0.463	0.531	0	131
BA	2906204	Canarana	24055	6991	0.496	0.555	0	382
BA	2906303	Canavieiras	32331	9783	0.434	0.596	0	1073
BA	2906402	Candeal	8895	2560	0.465	0.554	0	101
BA	2906501	Candeias	83077	25102	0.616	0.652	0	5711
BA	2906600	Candiba	13205	3680	0.481	0.578	0	244
BA	2906709	Cândido Sales	27916	7894	0.482	0.565	0	784
BA	2906808	Cansanção	32923	8995	0.438	0.53	0	389
BA	2906824	Canudos	15755	4287	0.453	0.554	0	244
BA	2906857	Capela do Alto Alegre	11527	3764	0.48	0.582	0	333
BA	2906873	Capim Grosso	26529	8409	0.514	0.62	0	1008
BA	2906899	Caraíbas	10225	2917	0.405	0.57	0	54
BA	2906907	Caravelas	21437	6159	0.473	0.626	0	602
BA	2907004	Cardeal da Silva	8271	2393	0.437	0.523	0	125
BA	2907103	Carinhanha	28378	7333	0.477	0.525	0	597
BA	2907202	Casa Nova	64944	17131	0.435	0.577	0	821
BA	2907301	Castro Alves	25419	7221	0.504	0.591	0	559
BA	2907400	Catolândia	2609	763	0.452	0.554	0	10
BA	2907509	Catu	51075	15268	0.578	0.66	0	2487
BA	2907558	Caturama	8847	2411	0.446	0.543	0	86
BA	2907608	Central	17027	4951	0.538	0.54	0	316
BA	2907707	Chorrochó	10734	2750	0.503	0.552	0	93
BA	2907806	Cícero Dantas	32304	10196	0.477	0.59	0	678
BA	2907905	Cipó	15764	4433	0.496	0.589	0	279
BA	2908002	Coaraci	20964	6494	0.491	0.615	0	787
BA	2908101	Cocos	18182	4885	0.471	0.558	0	295
BA	2908200	Conceição da Feira	20408	5751	0.548	0.606	0	686
BA	2908309	Conceição do Almeida	17895	5146	0.479	0.578	0	459
BA	2908408	Conceição do Coité	62042	18551	0.517	0.587	0	2213
BA	2908507	Conceição do Jacuípe	30123	8918	0.579	0.63	0	1427
BA	2908606	Conde	23594	6205	0.451	0.551	0	390
BA	2908705	Condeúba	16888	4699	0.447	0.559	0	373
BA	2908804	Contendas do Sincorá	4663	1355	0.477	0.579	0	96
BA	2908903	Coração de Maria	22431	6263	0.489	0.558	0	332
BA	2909000	Cordeiros	8169	2212	0.454	0.561	0	211
BA	2909109	Coribe	14301	4252	0.491	0.545	0	224
BA	2909208	Coronel João Sá	17066	4901	0.392	0.545	0	173
BA	2909307	Correntina	31259	8809	0.481	0.575	0	757
BA	2909406	Cotegipe	13638	3770	0.504	0.545	0	88
BA	2909505	Cravolândia	5042	1469	0.503	0.559	0	109
BA	2909604	Crisópolis	20056	6026	0.387	0.542	0	212
BA	2909703	Cristópolis	13280	3727	0.553	0.546	0	151
BA	2909802	Cruz das Almas	58584	17309	0.65	0.659	0	3794
BA	2909901	Curaçá	32165	8690	0.463	0.544	0	333
BA	2910008	Dário Meira	12841	3395	0.392	0.522	0	173
BA	2910057	Dias d'Ávila	66373	19972	0.584	0.651	0	4000
BA	2910107	Dom Basílio	11355	2978	0.482	0.547	0	149
BA	2910206	Dom Macedo Costa	3873	1182	0.531	0.598	0	73
BA	2910305	Elísio Medrado	7952	2568	0.527	0.59	0	155
BA	2910404	Encruzilhada	23786	6657	0.4	0.533	0	307
BA	2910503	Entre Rios	39883	11143	0.492	0.602	0	1208
BA	2910602	Esplanada	33278	8707	0.469	0.589	0	895
BA	2910701	Euclides da Cunha	56312	15918	0.43	0.565	0	1272
BA	2910727	Eunápolis	100246	29711	0.572	0.687	0	7357
BA	2910750	Fátima	17652	5272	0.459	0.554	0	216
BA	2910776	Feira da Mata	6179	1749	0.505	0.527	0	83
BA	2910800	Feira de Santana	556756	164359	0.619	0.71	1	47253
BA	2910859	Filadélfia	16749	4797	0.45	0.553	0	329
BA	2910909	Firmino Alves	5385	1613	0.464	0.596	0	104
BA	2911006	Floresta Azul	10660	3038	0.431	0.548	0	254
BA	2911105	Formosa do Rio Preto	22534	5614	0.536	0.576	0	235
BA	2911204	Gandu	30329	9286	0.508	0.645	1	954
BA	2911253	Gavião	4561	1389	0.508	0.566	0	81
BA	2911303	Gentio do Ouro	10720	2981	0.45	0.523	0	156
BA	2911402	Glória	15073	4285	0.479	0.563	0	198
BA	2911501	Gongogi	8344	2254	0.456	0.543	0	136
BA	2911600	Governador Mangabeira	19826	5447	0.594	0.594	0	586
BA	2911659	Guajeru	10383	2672	0.437	0.548	0	184
BA	2911709	Guanambi	78801	22412	0.584	0.663	0	5002
BA	2911808	Guaratinga	22195	6747	0.406	0.559	0	203
BA	2911857	Heliópolis	12444	3836	0.437	0.547	0	123
BA	2911907	Iaçu	25735	7371	0.461	0.588	0	632
BA	2912004	Ibiassucê	10077	2799	0.476	0.608	0	274
BA	2912103	Ibicaraí	24241	7587	0.524	0.609	0	910
BA	2912202	Ibicoara	17301	4759	0.484	0.583	0	294
BA	2912301	Ibicuí	15786	4835	0.435	0.586	0	440
BA	2912400	Ibipeba	17021	4948	0.545	0.577	0	116
BA	2912509	Ibipitanga	14171	3791	0.475	0.553	0	190
BA	2912608	Ibiquera	4865	1402	0.335	0.517	0	80
BA	2912707	Ibirapitanga	22610	6377	0.415	0.561	0	383
BA	2912806	Ibirapuã	7960	2468	0.467	0.641	0	226
BA	2912905	Ibirataia	18946	5609	0.424	0.571	0	696
BA	2913002	Ibitiara	15519	4225	0.49	0.55	0	154
BA	2913101	Ibititá	17832	5229	0.527	0.554	0	214
BA	2913200	Ibotirama	25422	7188	0.548	0.601	0	877
BA	2913309	Ichu	5255	1565	0.562	0.58	0	145
BA	2913408	Igaporã	15194	3975	0.516	0.586	0	281
BA	2913457	Igrapiúna	13347	3593	0.424	0.565	0	125
BA	2913507	Iguaí	25724	7466	0.382	0.559	0	408
BA	2913606	Ilhéus	184231	56490	0.59	0.688	0	15345
BA	2913705	Inhambupe	36290	10186	0.429	0.556	0	492
BA	2913804	Ipecaetá	15334	3842	0.424	0.506	0	92
BA	2913903	Ipiaú	44430	13243	0.551	0.687	0	2320
BA	2914000	Ipirá	59352	17124	0.39	0.568	0	1050
BA	2914109	Ipupiara	9290	2736	0.499	0.558	0	125
BA	2914208	Irajuba	7002	2115	0.453	0.544	0	101
BA	2914307	Iramaia	11988	3253	0.463	0.543	0	196
BA	2914406	Iraquara	22607	6123	0.523	0.548	0	442
BA	2914505	Irará	27492	7864	0.501	0.587	0	587
BA	2914604	Irecê	66404	19735	0.643	0.661	0	4314
BA	2914653	Itabela	28399	8026	0.465	0.614	0	585
BA	2914703	Itaberaba	61623	17888	0.485	0.638	0	2945
BA	2914802	Itabuna	204710	63809	0.643	0.695	0	21035
BA	2914901	Itacaré	24340	6936	0.413	0.594	0	575
[truncated: 3,509 more rows]
